# Supplementary material for: Silver-catalyzed tandem radical acylarylation of cinnamamides in aqueous media
Source: Royal Society of Chemistry journal article supplement (doi:10.1039/c4ra08529a), 2014-10-02

## Supporting Information

### **Silver-catalyzed tandem radical acylarylation of cinnamamides in aqueous media**

Hua Yang, Li-Na Guo and Xin-Hua Duan\*

*Department of Chemistry, School of Science and MOE Key Laboratory for Nonequilibrium Synthesis and Modulation of Condensed Matter, Xi'an Jiaotong University, Xi'an 710049, China*

duanxh@mail.xjtu.edu.cn

### **Table of Contents**

|                                                                                                          |            |
|----------------------------------------------------------------------------------------------------------|------------|
| General Information                                                                                      | <b>S2</b>  |
| Starting Materials                                                                                       | <b>S2</b>  |
| General Procedure for the Decarboxylative Cyclization of Cinnamamides with $\alpha$ -Oxocarboxylic Acids | <b>S3</b>  |
| Characterization of Products <b>3</b>                                                                    | <b>S4</b>  |
| Characterization of Products <b>4</b>                                                                    | <b>S10</b> |
| Investigation of the Reaction Mechanism                                                                  | <b>S13</b> |
| References                                                                                               | <b>S14</b> |
| $^1\text{H}$ NMR and $^{13}\text{C}$ NMR Spectra of the Products <b>3</b>                                | <b>S15</b> |
| $^1\text{H}$ NMR and $^{13}\text{C}$ NMR Spectra of the Products <b>4</b>                                | <b>S30</b> |

## General Information

All Reactions were carried out under an atmosphere of nitrogen with the strict exclusion of air. Column chromatography was carried out on silica gel.  $^1\text{H}$  NMR and  $^{13}\text{C}$  NMR spectra were recorded on a Bruker Advance III-400 in solvents as indicated. Chemical shift are reported in ppm from  $\text{CDCl}_3$  using TMS as internal standard. IR spectra were recorded on a Bruker Tensor 27 spectrometer and only major peaks are reported in  $\text{cm}^{-1}$ . HRMS were obtained on a Q-TOF micro spectrometer.

## Starting Materials

All of cinnamamides **1** were synthesized according to the literature, and the NMR spectroscopy were in full accordance with the data in the literature.<sup>1</sup> Phenylglyoxylic acid **2a** was purchased from Sigma-Aldrich. Other  $\alpha$ -oxocarboxylic acids **2** were prepared from the corresponding methyl ketones according to the reported procedure.<sup>2</sup>

## General Procedure for the Decarboxylative Cyclization of Cinnamamides with $\alpha$ -Oxocarboxylic Acids

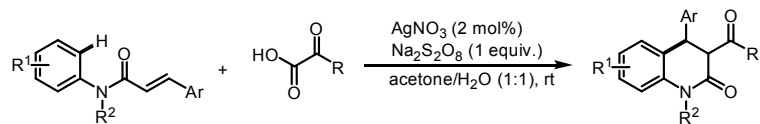

A 10 mL oven-dried Schlenk-tube was charged with  $AgNO_3$  (0.7 mg, 2 mol%), cinnamamides (**1**, 0.2 mmol, 1.0 equiv.) and  $Na_2S_2O_8$  (51 mg, 0.2 mmol, 1.0 equiv.). The tube was evacuated and backfilled with nitrogen (three times).  $\alpha$ -Oxocarboxylic acids (**2**, 0.24 mmol, 1.2 equiv.) in acetone/ $H_2O$  (1:1) 2 mL were added by syringe. Upon completion of the reaction, the mixture was diluted with EtOAc, filtered through a pad of Celite, and the filtrate was then removed under vacuo. The residue was purified with chromatography column on silica gel (gradient eluent of EtOAc/petroleum ether: 1/30 to 1/15) to give the corresponding products **3** or **4** in yields listed in Table 2 and Table 3.

### Characterization of Products 3

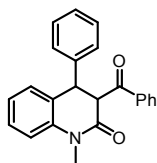

**3a:**  $R_f$  0.2 (EtOAc/petroleum ether = 1:4);  $^1\text{H}$  NMR (400 MHz,  $\text{CDCl}_3$ ):  $\delta$  = 7.99-7.97 (d,  $J$  = 7.2 Hz, 2H), 7.63-7.60 (t,  $J$  = 6.8 Hz, 1H), 7.52-7.48 (t,  $J$  = 7.2 Hz, 2H), 7.41-7.24 (m, 6H), 7.18-7.17 (d,  $J$  = 7.6 Hz, 1H), 7.09-7.05 (t,  $J$  = 7.2 Hz, 1H), 6.95-6.93 (d,  $J$  = 7.2 Hz, 1H), 5.03-5.01 (d,  $J$  = 7.6 Hz, 1H), 4.80-4.78 (d,  $J$  = 8.0 Hz, 1H), 3.53 (s, 3H);  $^{13}\text{C}$  NMR (100 MHz,  $\text{CDCl}_3$ ):  $\delta$  = 195.6, 166.7, 140.0, 139.4, 136.6, 133.3, 129.0, 128.7, 128.6, 128.1, 128.0, 127.4, 127.3, 123.5, 114.9, 55.7, 44.8, 29.9 ppm; IR (KBr):  $\nu_{\text{max}}$  1694, 1659, 1493, 1371  $\text{cm}^{-1}$ ; HRMS (ESI) calcd for  $\text{C}_{23}\text{H}_{20}\text{NO}_2$   $[\text{M}+\text{H}]^+$  342.1489, found 342.1496.

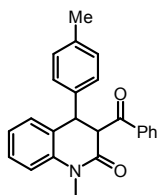

**3b:**  $R_f$  0.2 (EtOAc/petroleum ether = 1:4);  $^1\text{H}$  NMR (400 MHz,  $\text{CDCl}_3$ ):  $\delta$  = 7.92-7.90 (dd,  $J$  = 8.4, 1.2 Hz, 2H), 7.56-7.53 (t,  $J$  = 7.2 Hz, 1H), 7.45-7.41 (t,  $J$  = 7.2 Hz, 2H), 7.33-7.29 (td,  $J$  = 8.4, 1.2 Hz, 1H), 7.10-7.05 (m, 5H), 7.01-6.97 (t,  $J$  = 7.2 Hz, 1H), 6.88-6.86 (d,  $J$  = 7.6 Hz, 1H), 4.93-4.81 (d,  $J$  = 7.6 Hz, 1H), 4.68-4.66 (d,  $J$  = 8.0 Hz, 1H), 3.45 (s, 3H), 2.28 (s, 3H);  $^{13}\text{C}$  NMR (100 MHz,  $\text{CDCl}_3$ ):  $\delta$  = 195.7, 166.8, 139.4, 137.0, 136.9, 136.6, 133.3, 129.7, 128.7, 128.6, 128.0, 127.8, 127.6, 123.4, 114.9, 55.8, 44.4, 29.9, 21.0 ppm; IR (KBr):  $\nu_{\text{max}}$  1696, 1663, 1492, 1371  $\text{cm}^{-1}$ ; HRMS (ESI) calcd for  $\text{C}_{24}\text{H}_{22}\text{NO}_2$   $[\text{M}+\text{H}]^+$  356.1645, found 356.1650.

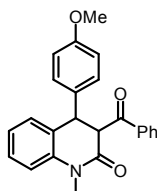

**3c:**  $R_f$  0.15 (EtOAc/petroleum ether = 1:4);  $^1\text{H}$  NMR (400 MHz,  $\text{CDCl}_3$ ):  $\delta$  = 7.91-7.89 (dd,  $J$  = 8.4, 1.2 Hz, 2H), 7.56-7.52 (t,  $J$  = 7.6 Hz, 1H), 7.45-7.41 (t,  $J$  = 7.2 Hz,

2H), 7.33-7.29 (td,  $J = 8.0, 0.8$  Hz, 1H), 7.10-7.08 (m, 3H), 7.02-6.98 (m, 1H), 6.88-6.86 (d,  $J = 7.6$  Hz, 1H), 6.82-6.80 (d,  $J = 8.8$  Hz, 2H), 4.91-4.89 (d,  $J = 8.4$  Hz, 1H), 4.69-4.67 (d,  $J = 8.4$  Hz, 1H), 3.76 (s, 3H), 3.45 (s, 3H);  $^{13}\text{C}$  NMR (100 MHz,  $\text{CDCl}_3$ ):  $\delta = 195.8, 166.9, 158.7, 139.4, 136.7, 133.3, 131.9, 129.1, 128.7, 128.6, 128.0, 127.8, 123.4, 114.9, 114.4, 55.9, 55.2, 44.1, 29.9$  ppm; IR (KBr):  $\nu_{\text{max}}$  1693, 1657, 1509, 1370  $\text{cm}^{-1}$ ; HRMS (ESI) calcd for  $\text{C}_{24}\text{H}_{21}\text{NNaO}_3$   $[\text{M}+\text{Na}]^+$  394.1414, found 394.1417.

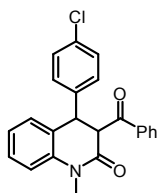

**3d:**  $R_f$  0.2 (EtOAc/petroleum ether = 1:4);  $^1\text{H}$  NMR (400 MHz,  $\text{CDCl}_3$ ):  $\delta = 7.90$ -7.88 (m, 2H), 7.58-7.54 (t,  $J = 7.2$  Hz, 1H), 7.46-7.42 (t,  $J = 7.2$  Hz, 2H), 7.35-7.31 (td,  $J = 8.0, 0.8$  Hz, 1H), 7.28-7.24 (m, 2H), 7.14-7.09 (m, 3H), 7.03-6.99 (td,  $J = 8.0, 0.8$  Hz, 1H), 6.83-6.81 (d,  $J = 7.2$  Hz, 1H), 4.90-4.88 (d,  $J = 8.8$  Hz, 1H), 4.73-4.71 (d,  $J = 8.4$  Hz, 1H), 3.44 (s, 3H);  $^{13}\text{C}$  NMR (100 MHz,  $\text{CDCl}_3$ ):  $\delta = 195.4, 166.5, 139.4, 138.4, 136.6, 133.5, 133.3, 129.6, 129.2, 128.7, 128.4, 128.3, 127.1, 123.6, 115.0, 55.4, 44.1, 30.0$  ppm; IR (KBr):  $\nu_{\text{max}}$  1695, 1665, 1464, 1371  $\text{cm}^{-1}$ ; HRMS (ESI) calcd for  $\text{C}_{23}\text{H}_{19}\text{ClNO}_2$   $[\text{M}+\text{H}]^+$  376.1099, found 376.1101.

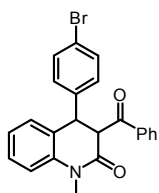

**3e:**  $R_f$  0.2 (EtOAc/petroleum ether = 1:4);  $^1\text{H}$  NMR (400 MHz,  $\text{CDCl}_3$ ):  $\delta = 7.90$ -7.88 (dd,  $J = 8.4, 1.2$  Hz, 2H), 7.55-7.53 (m, 1H), 7.46-7.40 (m, 4H), 7.39-7.31 (td,  $J = 8.0, 0.8$  Hz, 1H), 7.11-6.99 (m, 4H), 6.83-6.81 (d,  $J = 7.6$  Hz, 1H), 4.90-4.88 (d,  $J = 8.8$  Hz, 1H), 4.72-4.70 (d,  $J = 8.8$  Hz, 1H), 3.44 (s, 3H);  $^{13}\text{C}$  NMR (100 MHz,  $\text{CDCl}_3$ ):  $\delta = 195.3, 166.5, 139.4, 139.0, 136.6, 133.5, 132.1, 129.9, 128.7, 128.4, 128.3, 127.0, 123.6, 121.4, 115.0, 55.3, 44.1, 30.0$  ppm; IR (KBr):  $\nu_{\text{max}}$  1694, 1665, 1465, 1371  $\text{cm}^{-1}$ ; HRMS (ESI) calcd for  $\text{C}_{23}\text{H}_{19}\text{BrNO}_2$   $[\text{M}+\text{H}]^+$  420.0594, found 420.0603.

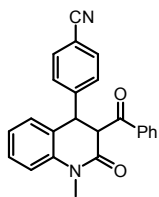

**3f:**  $R_f$  0.1 (EtOAc/petroleum ether = 1:4);  $^1\text{H NMR}$  (400 MHz,  $\text{CDCl}_3$ ):  $\delta$  = 7.89-7.88 (d,  $J$  = 7.6 Hz, 2H), 7.60-7.55 (m, 3H), 7.46-7.42 (t,  $J$  = 7.6 Hz, 2H), 7.37-7.31 (m, 3H), 7.13-7.11 (d,  $J$  = 8.0 Hz, 1H), 7.05-7.01 (t,  $J$  = 7.6 Hz, 1H), 6.79-6.77 (d,  $J$  = 7.6 Hz, 1H), 4.91-4.89 (d,  $J$  = 8.8 Hz, 1H), 4.82-4.80 (d,  $J$  = 8.8 Hz, 1H), 3.44 (s, 3H);  $^{13}\text{C NMR}$  (100 MHz,  $\text{CDCl}_3$ ):  $\delta$  = 194.9, 166.0, 145.5, 139.4, 136.4, 133.6, 132.8, 129.1, 128.7, 128.3, 126.2, 123.7, 118.4, 115.2, 111.5, 55.1, 44.6, 30.0 ppm; IR (KBr):  $\nu_{\text{max}}$  2229, 1685, 1660, 1467, 1369  $\text{cm}^{-1}$ ; HRMS (ESI) calcd for  $\text{C}_{24}\text{H}_{18}\text{N}_2\text{NaO}_2$   $[\text{M}+\text{Na}]^+$  389.1260, found 389.1265.

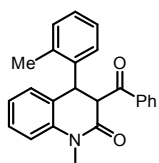

**3g:**  $R_f$  0.2 (EtOAc/petroleum ether = 1:4);  $^1\text{H NMR}$  (400 MHz,  $\text{CDCl}_3$ ):  $\delta$  = 7.88-7.86 (d,  $J$  = 8.4 Hz, 2H), 7.53-7.50 (t,  $J$  = 7.6 Hz, 1H), 7.42-7.38 (t,  $J$  = 7.6 Hz, 2H), 7.33-7.28 (d,  $J$  = 7.6 Hz, 1H), 7.20-7.18 (d,  $J$  = 7.6 Hz, 1H), 7.13-6.94 (m, 5H), 6.65-6.63 (d,  $J$  = 7.2 Hz, 1H), 5.10-5.07 (d,  $J$  = 11.2 Hz, 1H), 4.99-4.97 (d,  $J$  = 11.6 Hz, 1H), 3.46 (s, 3H), 2.41 (s, 3H);  $^{13}\text{C NMR}$  (100 MHz,  $\text{CDCl}_3$ ):  $\delta$  = 196.2, 167.6, 139.6, 137.6, 137.5, 137.2, 133.1, 130.8, 128.6, 128.5, 127.9, 127.8, 127.2, 126.7, 126.6, 123.6, 114.7, 53.8, 39.6, 30.0, 19.7 ppm; IR (KBr):  $\nu_{\text{max}}$  1691, 1662, 1463, 1364  $\text{cm}^{-1}$ ; HRMS (ESI) calcd for  $\text{C}_{24}\text{H}_{21}\text{NNaO}_2$   $[\text{M}+\text{Na}]^+$  378.1464, found 378.1470.

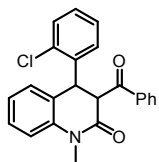

**3h:**  $R_f$  0.2 (EtOAc/petroleum ether = 1:4);  $^1\text{H NMR}$  (400 MHz,  $\text{CDCl}_3$ ):  $\delta$  = 8.01-7.99 (m, 2H), 7.58-7.54 (m, 1H), 7.46-7.40 (m, 3H), 7.35-7.32 (m, 1H), 7.20-7.16 (td,  $J$  = 7.6, 2.0 Hz, 1H), 7.14-7.11 (m, 2H), 7.10-7.02 (m, 1H), 6.91-6.86 (m, 2H), 5.19-5.17 (d,  $J$  = 6.8 Hz, 1H), 5.04-5.02 (d,  $J$  = 6.8 Hz, 1H), 3.44 (s, 3H);  $^{13}\text{C NMR}$  (100 MHz,  $\text{CDCl}_3$ ):  $\delta$  = 195.5, 166.3, 140.0, 137.5, 136.8, 134.2, 133.7, 130.6, 129.7, 129.3,

129.0, 128.8, 128.7, 128.6, 127.8, 126.7, 124.1, 115.3, 54.8, 41.8, 30.4 ppm; IR (KBr):  $\nu_{\max}$  1689, 1669, 1458, 1359  $\text{cm}^{-1}$ ; HRMS (ESI) calcd for  $\text{C}_{23}\text{H}_{19}\text{ClNO}_2$   $[\text{M}+\text{H}]^+$  376.1099, found 376.1098.

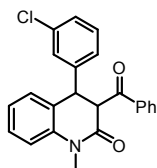

**3i:**  $R_f$  0.2 (EtOAc/petroleum ether = 1:4);  $^1\text{H}$  NMR (400 MHz,  $\text{CDCl}_3$ ):  $\delta$  = 7.90-7.88 (dd,  $J$  = 7.2, 1.2 Hz, 2H), 7.57-7.54 (t,  $J$  = 7.2 Hz, 1H), 7.46-7.42 (t,  $J$  = 7.2 Hz, 2H), 7.35-7.31 (td,  $J$  = 8.0, 0.8 Hz, 1H), 7.27-7.25 (m, 2H), 7.13-7.09 (m, 3H), 7.03-6.99 (td,  $J$  = 8.0, 0.8 Hz, 1H), 6.83-6.82 (d,  $J$  = 7.2 Hz, 1H), 4.90-4.88 (d,  $J$  = 8.8 Hz, 1H), 4.73-4.71 (d,  $J$  = 8.8 Hz, 1H), 3.44 (s, 3H);  $^{13}\text{C}$  NMR (100 MHz,  $\text{CDCl}_3$ ):  $\delta$  = 195.4, 166.5, 139.4, 138.4, 136.6, 133.5, 133.2, 129.6, 129.2, 128.7, 128.4, 128.3, 127.1, 123.6, 115.0, 55.4, 44.1, 30.0 ppm; IR (KBr):  $\nu_{\max}$  1695, 1665, 1463, 1371  $\text{cm}^{-1}$ .

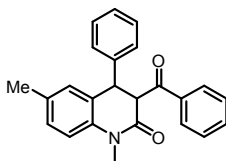

**3k:**  $R_f$  0.3 (EtOAc/petroleum ether = 1:4);  $^1\text{H}$  NMR (400 MHz,  $\text{CDCl}_3$ ):  $\delta$  = 7.92-7.90 (dd,  $J$  = 8.4, 1.2 Hz, 2H), 7.55-7.52 (m, 1H), 7.44-7.41 (m, 2H), 7.30-7.17 (m, 3H), 7.15-7.13 (dd,  $J$  = 8.4, 1.6 Hz, 2H), 7.09-7.07 (dd,  $J$  = 8.4, 1.2 Hz, 1H), 6.99-6.97 (d,  $J$  = 8.4 Hz, 1H), 6.69 (s, 1H), 4.91-4.89 (d,  $J$  = 7.2 Hz, 1H), 4.65-4.63 (d,  $J$  = 7.2 Hz, 1H), 3.42 (s, 3H), 2.21 (s, 3H);  $^{13}\text{C}$  NMR (100 MHz,  $\text{CDCl}_3$ ):  $\delta$  = 195.6, 166.3, 140.3, 137.1, 136.4, 133.3, 133.1, 129.3, 129.0, 128.7, 128.6, 127.9, 127.3, 126.9, 114.8, 56.2, 44.9, 29.9, 20.6 ppm; IR (KBr):  $\nu_{\max}$  1688, 1663, 1472, 1372  $\text{cm}^{-1}$ ; HRMS (ESI) calcd for  $\text{C}_{24}\text{H}_{21}\text{NNaO}_2$   $[\text{M}+\text{Na}]^+$  378.1464, found 378.1475.

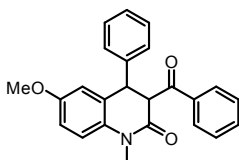

**3l:**  $R_f$  0.1 (EtOAc/petroleum ether = 1:4);  $^1\text{H}$  NMR (400 MHz,  $\text{CDCl}_3$ ):  $\delta$  = 7.93-7.90 (dd,  $J$  = 8.4, 1.2 Hz, 2H), 7.56-7.52 (t,  $J$  = 7.6 Hz, 1H), 7.45-7.41 (t,  $J$  = 8.0 Hz, 2H), 7.30-7.16 (m, 5H), 7.03-7.00 (d,  $J$  = 8.8 Hz, 1H), 6.85-6.82 (dd,  $J$  = 8.8, 2.8 Hz, 1H),

6.45-6.44 (d,  $J = 2.8$  Hz, 1H), 4.91-4.89 (d,  $J = 7.6$  Hz, 1H), 4.67-4.65 (d,  $J = 7.6$  Hz, 1H), 3.69 (s, 3H), 3.42 (s, 3H);  $^{13}\text{C}$  NMR (100 MHz,  $\text{CDCl}_3$ ):  $\delta = 195.6, 166.1, 155.7, 139.9, 136.6, 133.3, 133.1, 129.0, 128.8, 128.7, 128.6, 128.0, 127.4, 115.9, 114.9, 112.4, 55.9, 55.4, 45.0, 30.1$  ppm; IR (KBr):  $\nu_{\text{max}}$  1688, 1653, 1499, 1376  $\text{cm}^{-1}$ ; HRMS (ESI) calcd for  $\text{C}_{24}\text{H}_{21}\text{NNaO}_3$   $[\text{M}+\text{Na}]^+$  394.1414, found 394.1416.

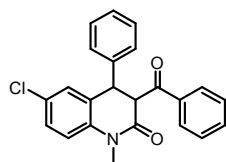

**3m**:  $R_f$  0.2 (EtOAc/petroleum ether = 1:4);  $^1\text{H}$  NMR (400 MHz,  $\text{CDCl}_3$ ):  $\delta = 7.92$ -7.90 (dd,  $J = 8.8, 1.6$  Hz, 2H), 7.58-7.54 (td,  $J = 7.6, 1.2$  Hz, 1H), 7.46-7.42 (t,  $J = 8.0$  Hz, 2H), 7.31-7.24 (m, 4H), 7.17-7.14 (dd,  $J = 8.8, 1.6$  Hz, 2H), 7.03-7.01 (d,  $J = 8.8$  Hz, 1H), 6.87 (d,  $J = 2.0$  Hz, 1H), 4.93-4.91 (d,  $J = 7.6$  Hz, 1H), 4.67-4.65 (d,  $J = 7.2$  Hz, 1H), 3.43 (s, 3H);  $^{13}\text{C}$  NMR (100 MHz,  $\text{CDCl}_3$ ):  $\delta = 195.2, 166.2, 139.3, 138.2, 136.3, 133.5, 129.2, 129.1, 128.8, 128.7, 128.6, 128.1, 127.9, 127.7, 116.2, 55.6, 44.7, 30.1$  ppm; IR (KBr):  $\nu_{\text{max}}$  1689, 1664, 1452, 1368  $\text{cm}^{-1}$ ; HRMS (ESI) calcd for  $\text{C}_{23}\text{H}_{19}\text{ClNO}_2$   $[\text{M}+\text{H}]^+$  376.1099, found 376.1103.

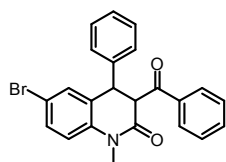

**3n**:  $R_f$  0.2 (EtOAc/petroleum ether = 1:4);  $^1\text{H}$  NMR (400 MHz,  $\text{CDCl}_3$ ):  $\delta = 7.92$ -7.90 (d,  $J = 7.6$  Hz, 2H), 7.58-7.55 (t,  $J = 7.6$  Hz, 1H), 7.47-7.41 (m, 3H), 7.32-7.24 (m, 3H), 7.16-7.14 (d,  $J = 7.2$  Hz, 2H), 7.02 (d,  $J = 1.6$  Hz, 1H), 6.98-6.96 (d,  $J = 8.8$  Hz, 1H), 4.92-4.90 (d,  $J = 7.2$  Hz, 1H), 4.66-4.65 (d,  $J = 7.6$  Hz, 1H), 3.43 (s, 3H);  $^{13}\text{C}$  NMR (100 MHz,  $\text{CDCl}_3$ ):  $\delta = 195.1, 166.2, 139.4, 138.7, 136.2, 133.6, 131.5, 131.0, 129.4, 129.2, 128.8, 128.7, 127.8, 127.7, 116.6, 116.4, 55.7, 44.7, 30.0$  ppm; IR (KBr):  $\nu_{\text{max}}$  1689, 1664, 1466, 1368  $\text{cm}^{-1}$ ; HRMS (ESI) calcd for  $\text{C}_{23}\text{H}_{18}\text{BrNNaO}_2$   $[\text{M}+\text{Na}]^+$  442.0413, found 442.0428.

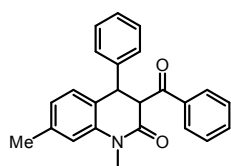



**3o**:  $R_f$  0.25 (EtOAc/petroleum ether = 1:4);  $^1\text{H}$  NMR (400 MHz,  $\text{CDCl}_3$ ):  $\delta$  = 7.91-7.90 (d,  $J$  = 7.2 Hz, 2H), 7.56-7.52 (t,  $J$  = 7.2 Hz, 1H), 7.45-7.41 (t,  $J$  = 7.6 Hz, 2H), 7.33-7.29 (td,  $J$  = 8.4, 1.2 Hz, 1H), 7.17-7.14 (t,  $J$  = 7.6 Hz, 1H), 7.10-7.08 (d,  $J$  = 8.0 Hz, 1H), 7.03-6.98 (m, 3H), 6.95-6.93 (d,  $J$  = 8.0 Hz, 1H), 6.88-6.86 (d,  $J$  = 7.6 Hz, 1H), 4.94-4.92 (d,  $J$  = 7.6 Hz, 1H), 4.67-4.65 (d,  $J$  = 8.0 Hz, 1H), 3.45 (s, 3H), 2.28 (s, 3H);  $^{13}\text{C}$  NMR (100 MHz,  $\text{CDCl}_3$ ):  $\delta$  = 195.7, 166.8, 139.9, 139.4, 138.6, 136.6, 133.3, 128.9, 128.8, 128.7, 128.6, 128.2, 128.1, 127.4, 124.8, 123.4, 114.9, 55.7, 44.8, 29.9, 21.5 ppm; IR (KBr):  $\nu_{\text{max}}$  1693, 1663, 1465, 1369  $\text{cm}^{-1}$ ; HRMS (ESI) calcd for  $\text{C}_{24}\text{H}_{21}\text{NNaO}_2$   $[\text{M}+\text{Na}]^+$  378.1464, found 378.1476.

## Characterization of Products 4

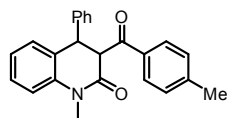

**4a:**  $R_f$  0.25 (EtOAc/petroleum ether = 1:4);  $^1\text{H}$  NMR (400 MHz,  $\text{CDCl}_3$ ):  $\delta$  = 7.83-7.81 (d,  $J$  = 8.4 Hz, 2H), 7.31-7.17 (m, 8H), 7.11-7.09 (d,  $J$  = 8.0 Hz, 1H), 7.02-6.98 (t,  $J$  = 7.6 Hz, 1H), 6.89-6.87 (t,  $J$  = 7.2 Hz, 1H), 4.93-4.91 (d,  $J$  = 7.6 Hz, 1H), 4.71-4.69 (d,  $J$  = 7.2 Hz, 1H), 3.45 (s, 3H), 2.39 (s, 3H);  $^{13}\text{C}$  NMR (100 MHz,  $\text{CDCl}_3$ ):  $\delta$  = 195.1, 166.7, 144.3, 140.2, 139.5, 134.0, 129.3, 129.0, 128.9, 128.7, 128.1, 128.0, 127.3, 123.4, 114.9, 55.7, 44.9, 29.9, 21.6 ppm; IR (KBr):  $\nu_{\text{max}}$  1668, 1600, 1456, 1365  $\text{cm}^{-1}$ ; HRMS (ESI) calcd for  $\text{C}_{24}\text{H}_{21}\text{NNaO}_2$   $[\text{M}+\text{Na}]^+$  378.1464, found 378.1475.

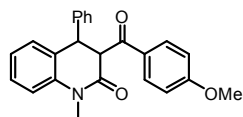

**4b:**  $R_f$  0.1 (EtOAc/petroleum ether = 1:4);  $^1\text{H}$  NMR (400 MHz,  $\text{CDCl}_3$ ):  $\delta$  = 7.92-7.89 (d,  $J$  = 8.8 Hz, 2H), 7.28-7.14 (m, 6H), 7.08-7.06 (d,  $J$  = 8.4 Hz, 1H), 7.00-6.96 (t,  $J$  = 7.6 Hz, 1H), 6.89-6.87 (dd,  $J$  = 8.8, 2.4 Hz, 3H), 4.88-4.86 (d,  $J$  = 7.2 Hz, 1H), 4.68-4.66 (d,  $J$  = 7.6 Hz, 1H), 3.82 (s, 3H), 3.42 (s, 3H);  $^{13}\text{C}$  NMR (100 MHz,  $\text{CDCl}_3$ ):  $\delta$  = 193.7, 166.7, 163.7, 140.3, 139.5, 131.2, 129.4, 129.0, 128.7, 128.0, 127.9, 127.4, 127.3, 123.4, 114.8, 113.8, 55.53, 55.46, 44.9, 29.9 ppm; IR (KBr):  $\nu_{\text{max}}$  1665, 1599, 1458, 1371  $\text{cm}^{-1}$ ; HRMS (ESI) calcd for  $\text{C}_{24}\text{H}_{21}\text{NNaO}_3$   $[\text{M}+\text{Na}]^+$  394.1414, found 394.1421.

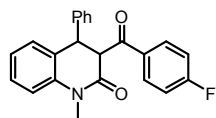

**4c:**  $R_f$  0.25 (EtOAc/petroleum ether = 1:4);  $^1\text{H}$  NMR (400 MHz,  $\text{CDCl}_3$ ):  $\delta$  = 7.96-7.92 (dd,  $J$  = 8.4, 4.2 Hz, 2H), 7.34-7.07 (m, 9H), 7.03-6.99 (t,  $J$  = 8.0 Hz, 1H), 6.88-6.86 (d,  $J$  = 7.6 Hz, 1H), 4.90-4.88 (d,  $J$  = 8.4 Hz, 1H), 4.73-4.71 (d,  $J$  = 8.4 Hz, 1H), 3.44 (s, 3H);  $^{13}\text{C}$  NMR (100 MHz,  $\text{CDCl}_3$ ):  $\delta$  = 194.0, 166.5, 165.8 (d,  $J_{\text{C-F}}$  = 253.9 Hz), 139.8, 139.3, 133.2, 131.4 (d,  $J_{\text{C-F}}$  = 9.4 Hz), 129.0, 128.6, 128.1, 127.5 (d,  $J_{\text{C-F}}$  = 8.0 Hz), 123.6, 115.7 (d,  $J_{\text{C-F}}$  = 21.8 Hz), 114.9, 55.6, 44.7, 29.7 ppm; IR (KBr):  $\nu_{\text{max}}$  1697, 1664, 1468, 1373  $\text{cm}^{-1}$ ; HRMS (ESI) calcd for  $\text{C}_{23}\text{H}_{18}\text{FNNaO}_2$   $[\text{M}+\text{Na}]^+$

382.1214, found 382.1215.

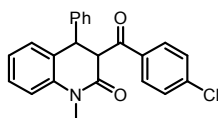

**4d:**  $R_f$  0.3 (EtOAc/petroleum ether = 1:4);  $^1\text{H NMR}$  (400 MHz,  $\text{CDCl}_3$ ):  $\delta$  = 7.82-7.80 (d,  $J$  = 8.4 Hz, 2H), 7.37-7.35 (d,  $J$  = 8.8 Hz, 2H), 7.31-7.20 (m, 4H), 7.15-7.13 (d,  $J$  = 7.2 Hz, 2H), 7.08-7.06 (d,  $J$  = 8.4 Hz, 1H), 7.00-6.96 (t,  $J$  = 7.2 Hz, 1H), 6.84-6.82 (d,  $J$  = 7.6 Hz, 1H), 4.86-4.84 (d,  $J$  = 8.8 Hz, 1H), 4.71-4.68 (d,  $J$  = 8.8 Hz, 1H), 3.41 (s, 3H);  $^{13}\text{C NMR}$  (100 MHz,  $\text{CDCl}_3$ ):  $\delta$  = 194.5, 166.5, 139.8, 139.7, 139.3, 135.1, 130.1, 129.0, 128.9, 128.6, 128.1, 127.5, 123.6, 114.9, 55.6, 44.6, 30.0 ppm; IR (KBr):  $\nu_{\text{max}}$  1701, 1658, 1463, 1374  $\text{cm}^{-1}$ ; HRMS (ESI) calcd for  $\text{C}_{23}\text{H}_{19}\text{ClNO}_2$   $[\text{M}+\text{H}]^+$  376.1099, found 376.1103.

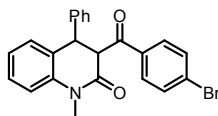

**4e:**  $R_f$  0.3 (EtOAc/petroleum ether = 1:4);  $^1\text{H NMR}$  (400 MHz,  $\text{CDCl}_3$ ):  $\delta$  = 7.77-7.75 (d,  $J$  = 8.8 Hz, 2H), 7.57-7.55 (d,  $J$  = 8.4 Hz, 2H), 7.32-7.23 (m, 4H), 7.17-7.15 (d,  $J$  = 7.2 Hz, 2H), 7.10-7.08 (d,  $J$  = 8.0 Hz, 1H), 7.03-6.99 (t,  $J$  = 7.6 Hz, 1H), 6.87-6.85 (d,  $J$  = 7.2 Hz, 1H), 4.88-4.85 (d,  $J$  = 8.8 Hz, 1H), 4.73-4.71 (d,  $J$  = 8.8 Hz, 1H), 3.44 (s, 3H);  $^{13}\text{C NMR}$  (100 MHz,  $\text{CDCl}_3$ ):  $\delta$  = 194.7, 166.5, 139.7, 139.3, 135.6, 131.9, 130.2, 129.0, 128.6, 128.1, 127.5, 123.6, 114.9, 55.7, 44.6, 30.0 ppm; IR (KBr):  $\nu_{\text{max}}$  1689, 1663, 1459, 1376  $\text{cm}^{-1}$ ; HRMS (ESI) calcd for  $\text{C}_{23}\text{H}_{19}\text{BrNO}_2$   $[\text{M}+\text{H}]^+$  420.0594, found 420.0596.

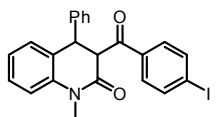

**4f:**  $R_f$  0.3 (EtOAc/petroleum ether = 1:4);  $^1\text{H NMR}$  (400 MHz,  $\text{CDCl}_3$ ):  $\delta$  = 7.79-7.77 (d,  $J$  = 8.4 Hz, 2H), 7.61-7.59 (d,  $J$  = 8.8 Hz, 2H), 7.31-7.22 (m, 4H), 7.17-7.15 (d,  $J$  = 7.2 Hz, 2H), 7.10-7.08 (d,  $J$  = 8.0 Hz, 1H), 7.02-6.98 (t,  $J$  = 7.6 Hz, 1H), 6.86-6.84 (d,  $J$  = 7.6 Hz, 1H), 4.86-4.84 (d,  $J$  = 8.4 Hz, 1H), 4.72-4.70 (d,  $J$  = 8.8 Hz, 1H), 3.44 (s, 3H);  $^{13}\text{C NMR}$  (100 MHz,  $\text{CDCl}_3$ ):  $\delta$  = 195.0, 166.5, 139.7, 139.3, 137.9, 136.1, 130.0, 129.0, 128.7, 128.6, 128.1, 127.5, 123.6, 114.9, 101.5, 55.6, 44.6, 30.0 ppm; IR

(KBr):  $\nu_{\max}$  1689, 1661, 1461, 1377  $\text{cm}^{-1}$ ; HRMS (ESI) calcd for  $\text{C}_{23}\text{H}_{19}\text{INO}_2$   $[\text{M}+\text{H}]^+$  468.0455, found 468.0455.

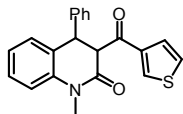

**4g:**  $R_f$  0.1 (EtOAc/petroleum ether = 1:4);  $^1\text{H}$  NMR (400 MHz,  $\text{CDCl}_3$ ):  $\delta$  = 7.86-7.84 (d,  $J$  = 3.2 Hz, 1H), 7.64-7.62 (d,  $J$  = 4.4 Hz, 1H), 7.34-7.17 (m, 6H), 7.12-7.09 (m, 2H), 7.04-7.00 (t,  $J$  = 7.6 Hz, 1H), 6.94-6.92 (d,  $J$  = 7.6 Hz, 1H), 4.76-4.72 (m, 2H), 3.45 (s, 3H);  $^{13}\text{C}$  NMR (100 MHz,  $\text{CDCl}_3$ ):  $\delta$  = 187.6, 166.0, 143.7, 139.9, 139.4, 134.7, 133.4, 129.0, 128.7, 128.3, 128.1, 127.4, 127.3, 123.6, 114.9, 57.5, 44.9, 30.0 ppm; IR (KBr):  $\nu_{\max}$  1652, 1665, 1495, 1366  $\text{cm}^{-1}$ ; HRMS (ESI) calcd for  $\text{C}_{21}\text{H}_{17}\text{NNaO}_2\text{S}$   $[\text{M}+\text{Na}]^+$  370.0872, found 370.0886.

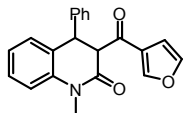

**4h:**  $R_f$  0.1 (EtOAc/petroleum ether = 1:4);  $^1\text{H}$  NMR (400 MHz,  $\text{CDCl}_3$ ):  $\delta$  = 7.57 (s, 1H), 7.33-7.19 (m, 7H), 7.10-7.08 (d,  $J$  = 8.0 Hz, 1H), 7.01-6.97 (t,  $J$  = 7.6 Hz, 1H), 6.84-6.82 (d,  $J$  = 7.6 Hz, 1H), 6.51 (d,  $J$  = 2.0 Hz, 1H), 4.77 (s, 2H), 3.45 (s, 3H);  $^{13}\text{C}$  NMR (100 MHz,  $\text{CDCl}_3$ ):  $\delta$  = 183.9, 166.5, 152.5, 146.7, 139.5, 128.9, 128.5, 128.3, 128.1, 127.5, 127.4, 123.4, 118.4, 114.8, 112.6, 56.0, 44.3, 29.9 ppm; IR (KBr):  $\nu_{\max}$  1665, 1598, 1497, 1369  $\text{cm}^{-1}$ ; HRMS (ESI) calcd for  $\text{C}_{21}\text{H}_{18}\text{NO}_3$   $[\text{M}+\text{H}]^+$  332.1281, found 332.1287.

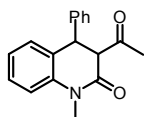

**4i:**  $R_f$  0.2 (EtOAc/petroleum ether = 1:4);  $^1\text{H}$  NMR (400 MHz,  $\text{CDCl}_3$ ):  $\delta$  = 7.33-7.25 (m, 4H), 7.12-6.94 (m, 5H), 4.66-4.64 (d,  $J$  = 7.6 Hz, 1H), 3.97-3.95 (d,  $J$  = 7.6 Hz, 1H), 3.43 (s, 3H), 2.19 (s, 3H);  $^{13}\text{C}$  NMR (100 MHz,  $\text{CDCl}_3$ ):  $\delta$  = 166.5, 139.8, 139.1, 129.0, 128.8, 128.1, 127.9, 127.4, 123.7, 114.9, 61.6, 43.6, 29.88, 29.86 ppm; IR (KBr):  $\nu_{\max}$  1718, 1656, 1455, 1369  $\text{cm}^{-1}$ ; HRMS (ESI) calcd for  $\text{C}_{18}\text{H}_{17}\text{NNaO}_2$   $[\text{M}+\text{Na}]^+$  302.1151, found 302.1150.

## Investigation of the Reaction Mechanism

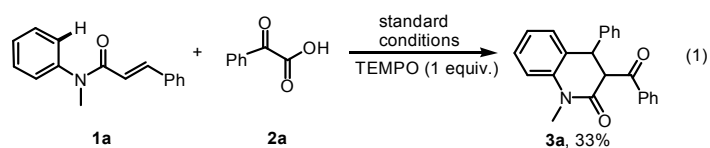

When the TEMPO was added to the reaction of **1a** with **2a** under the standard condition, the yield of **3a** was decreased dramatically. This result indicates that the radical intermediate might be involved in the catalytic cycle of the reaction.

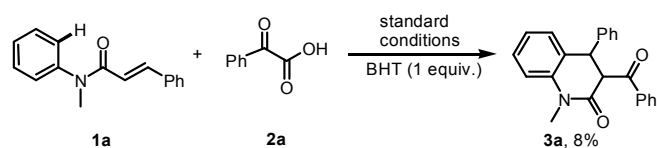

When the BHT was added to the reaction of **1a** with **2a** under the standard condition, the yield of **3a** was decreased dramatically. This result also indicates that the radical intermediate might be involved in the catalytic cycle of the reaction.

## References

- 1 (a) S. Ueda, T. Okada and H. Nagasawa, *Chem. Commun.*, 2010, **46**, 2462; (b) L. Liu, H. Lu, H. Wang, C. Yang, X. Zhang, D. Zhang-Negrerie, Y. Du and K. Zhao, *Org. Lett.*, 2013, **15**, 2906; (c) M. C. Elliott and S. V. Wordingham, *Synlett*, 2004, 898.
- 2 Wadhwa, K.; Yang, C.; West, P. R.; Deming, K. C.; Chemburkar, S. R.; Reddy, R. E. *Synth. Commun.* **2008**, *38*, 4434.

# $^1\text{H}$ NMR and $^{13}\text{C}$ NMR Spectra of the Products 3

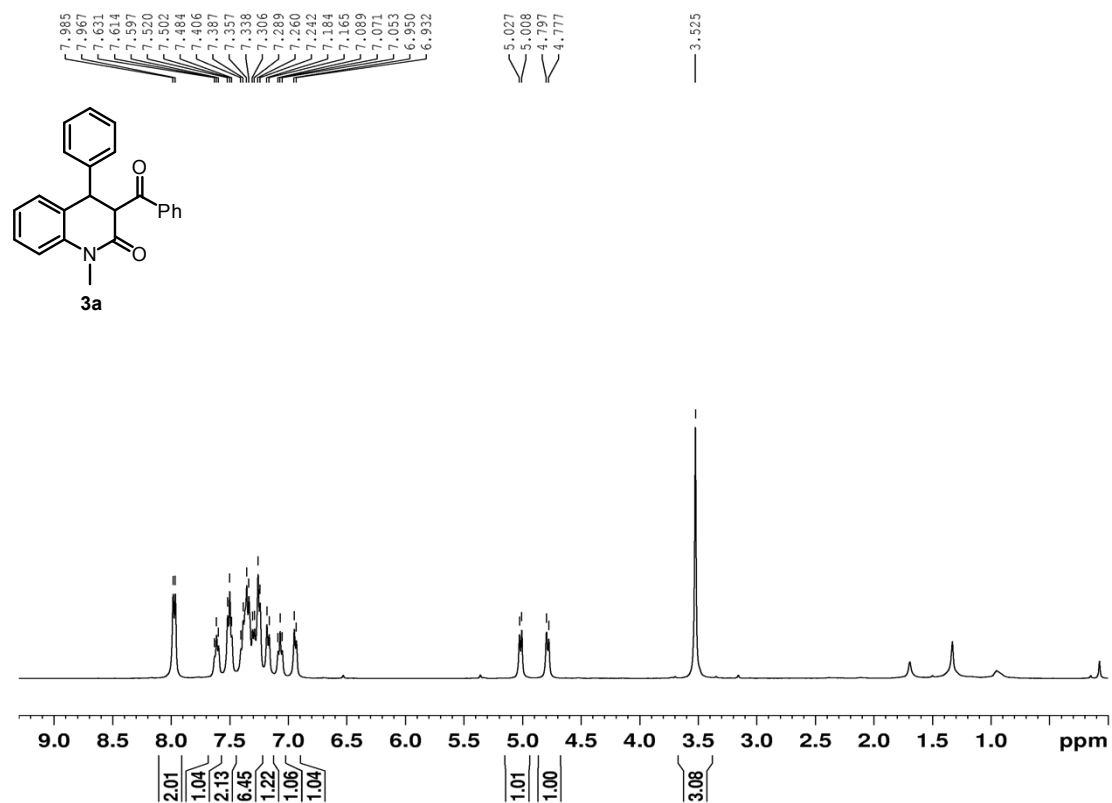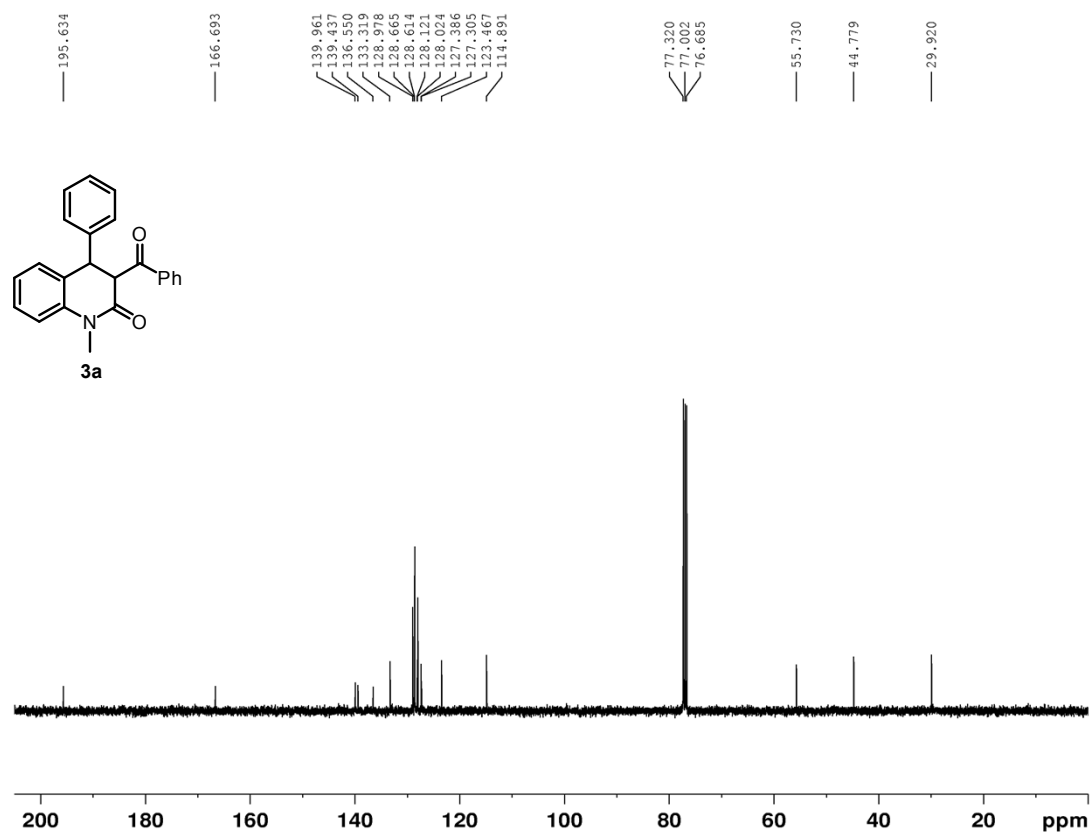

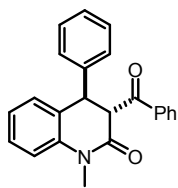

**trans-3a**

| 参数                        | 值 (f2, f1)                |
|---------------------------|---------------------------|
| 1 Data File Name          | 2rr                       |
| 2 Origin                  | Bruker<br>BioSpin<br>GmbH |
| 3 Owner                   | nmr                       |
| 4 Spectrometer            | spect                     |
| 5 Author                  |                           |
| 6 Solvent                 | CDCl3                     |
| 7 Temperature             | 298.9                     |
| 8 Pulse Sequence          | noesyph                   |
| 9 Experiment              | 2D-NOESY                  |
| 10 Number of Scans        | 256                       |
| 11 Receiver Gain          | 64                        |
| 12 Acquisition Time       | 0.2507                    |
| 13 Spectrometer Frequency | (400.13, 400.13)          |
| 14 Spectral Width         | (4085.0, 4085.0)          |
| 15 Lowest Frequency       | (-192.6, -191.8)          |
| 16 Nucleus                | (1H, 1H)                  |
| 17 Acquired Size          | (1024, 128)               |
| 18 Spectral Size          | (1024, 1024)              |

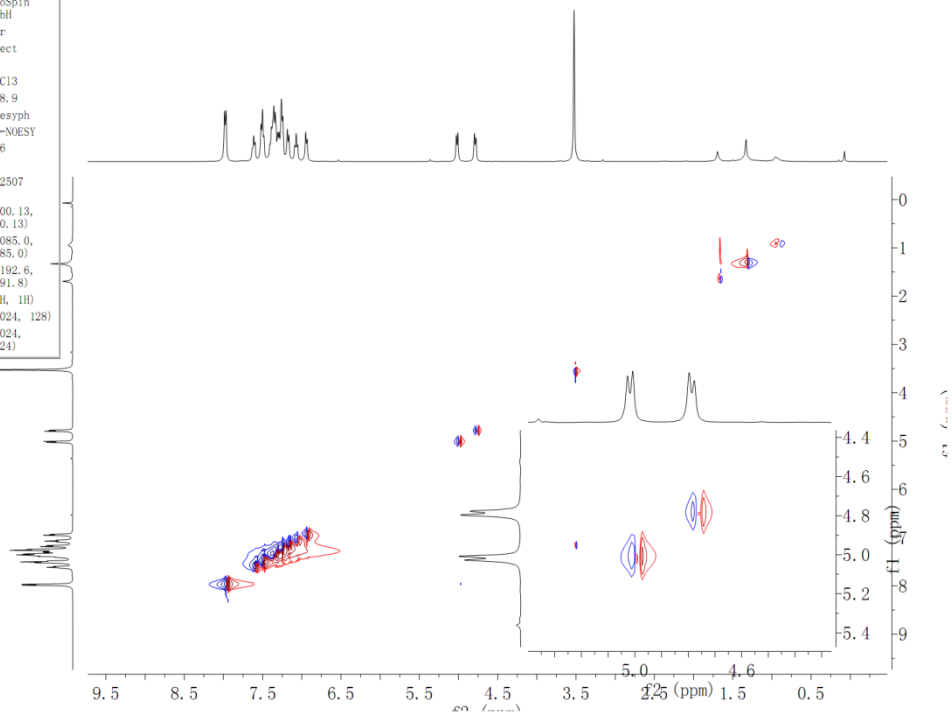



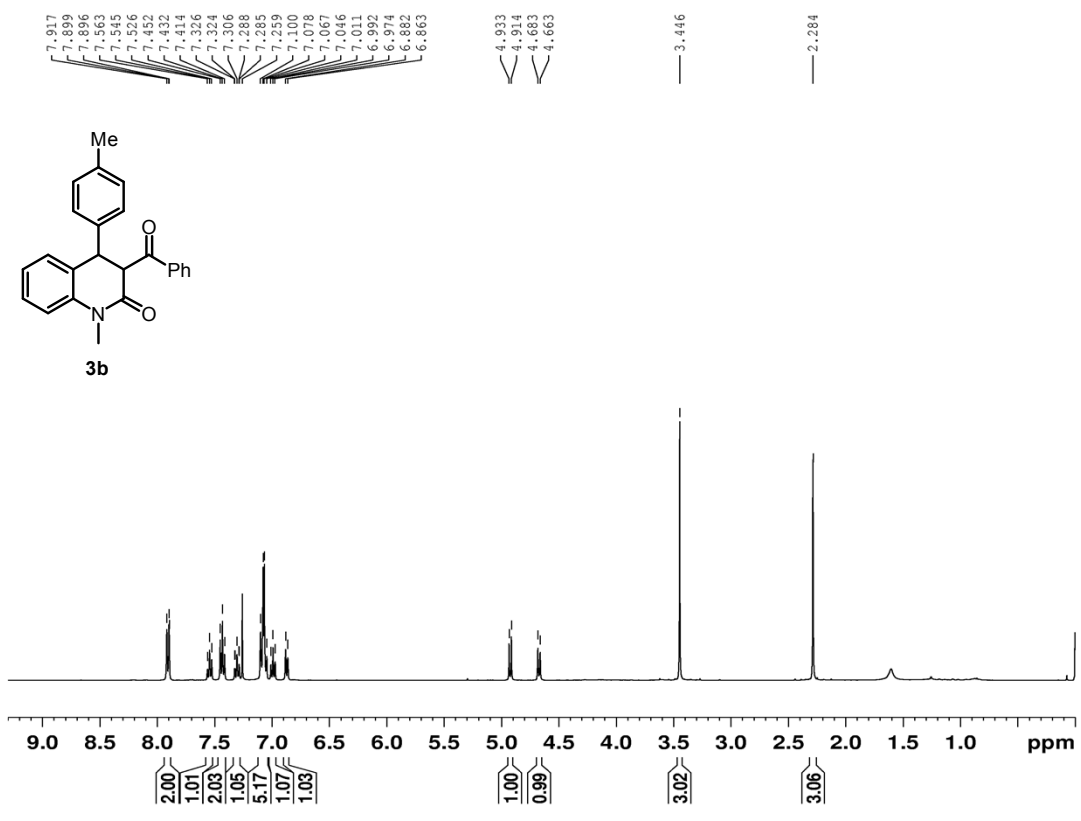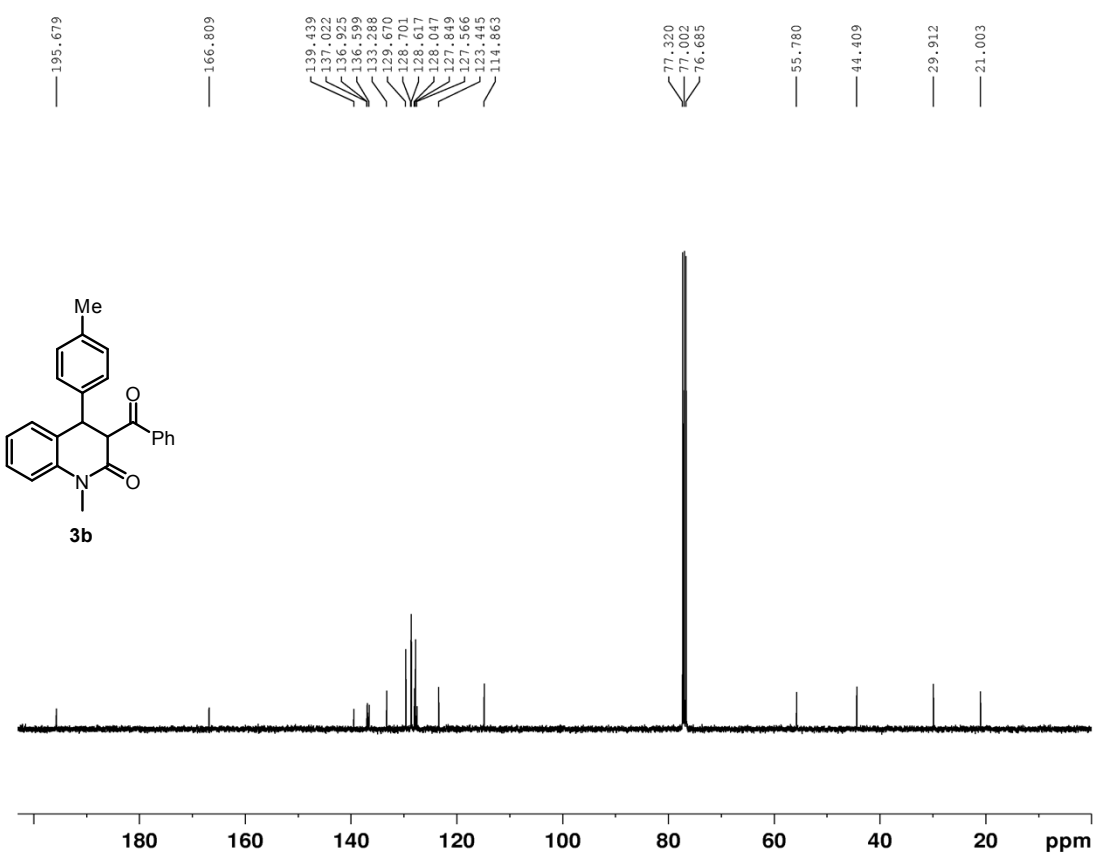

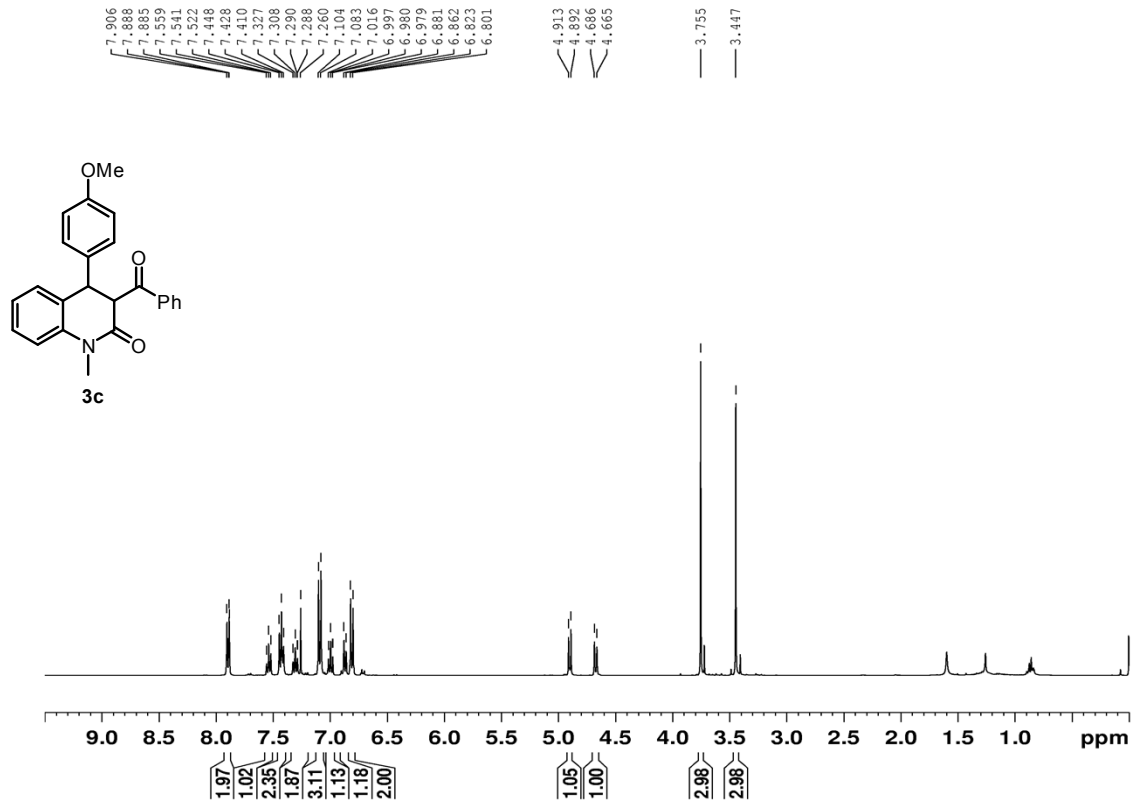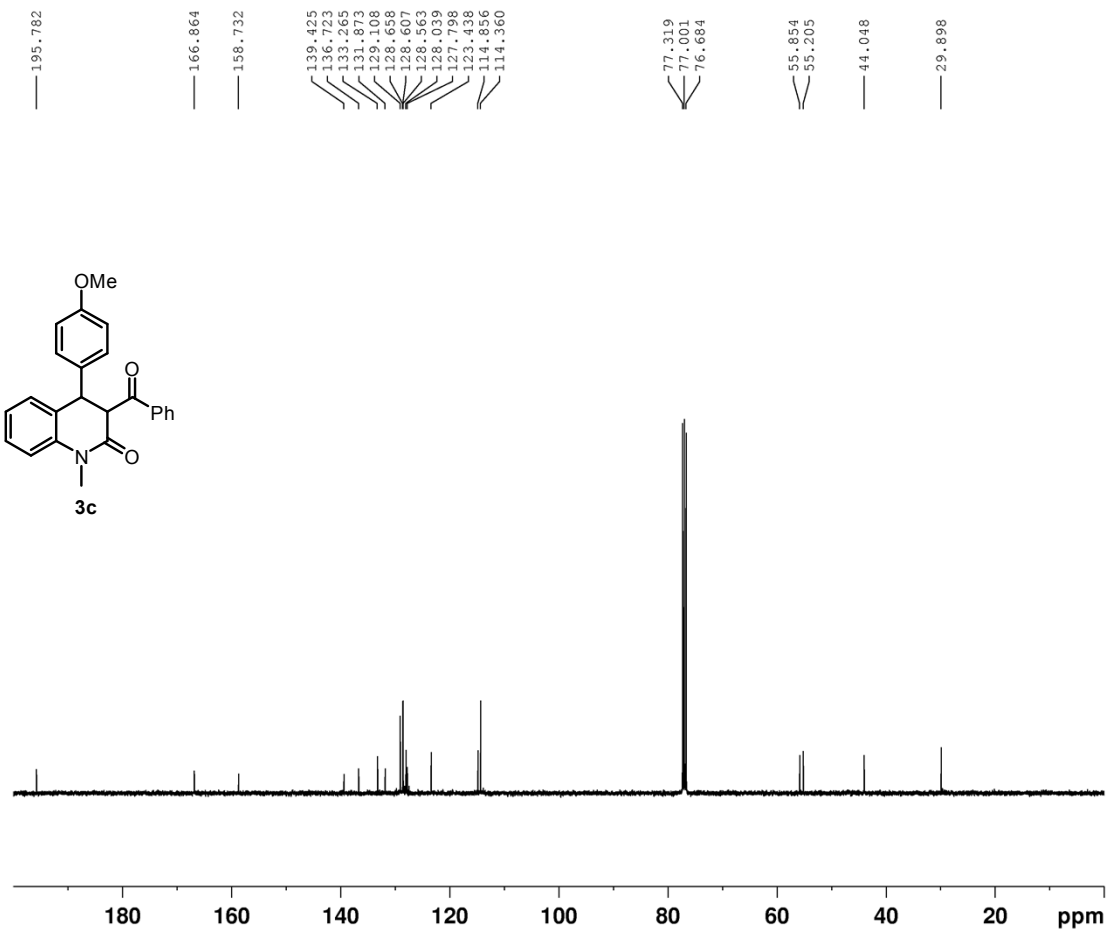

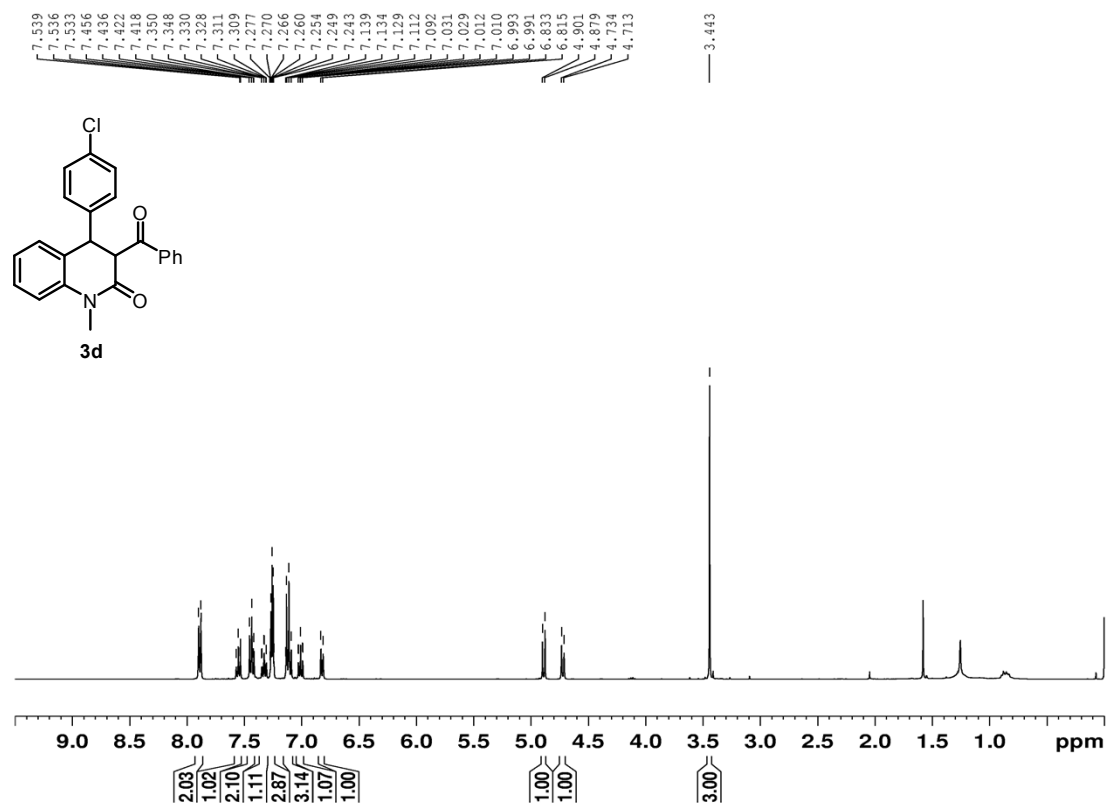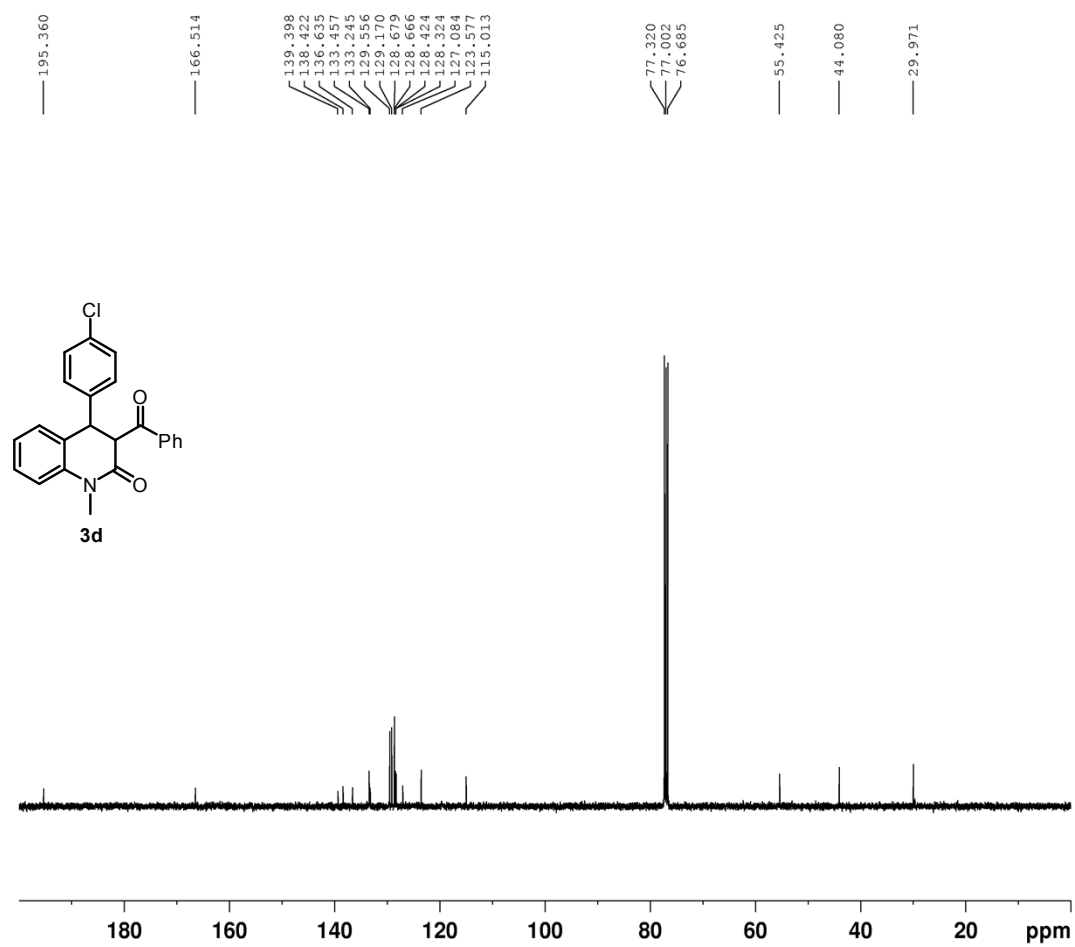

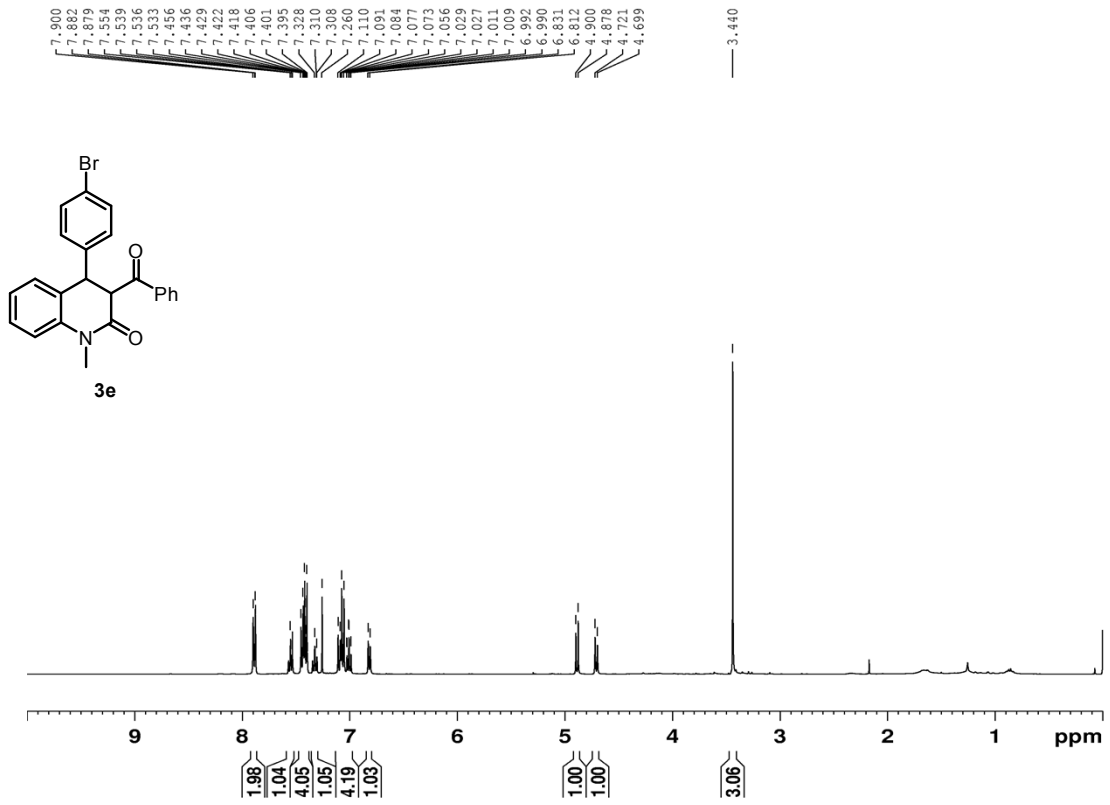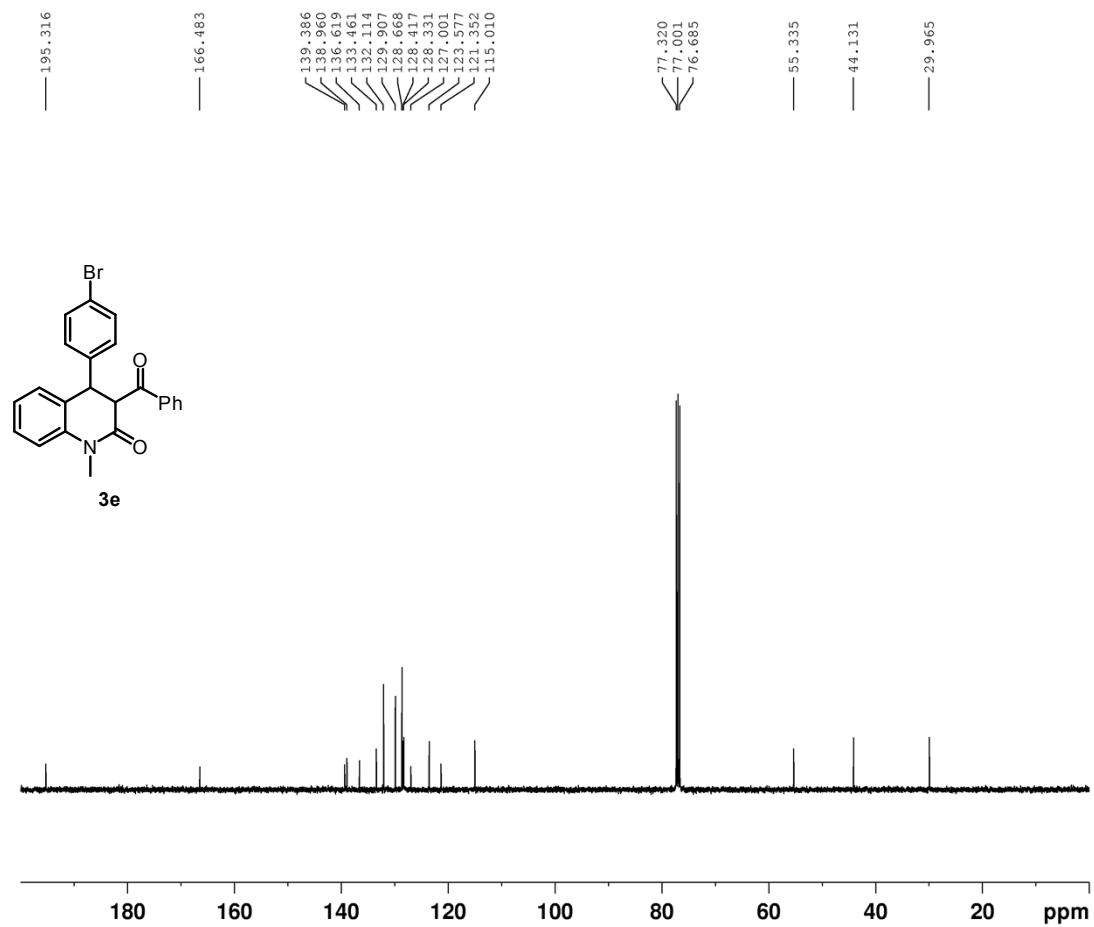

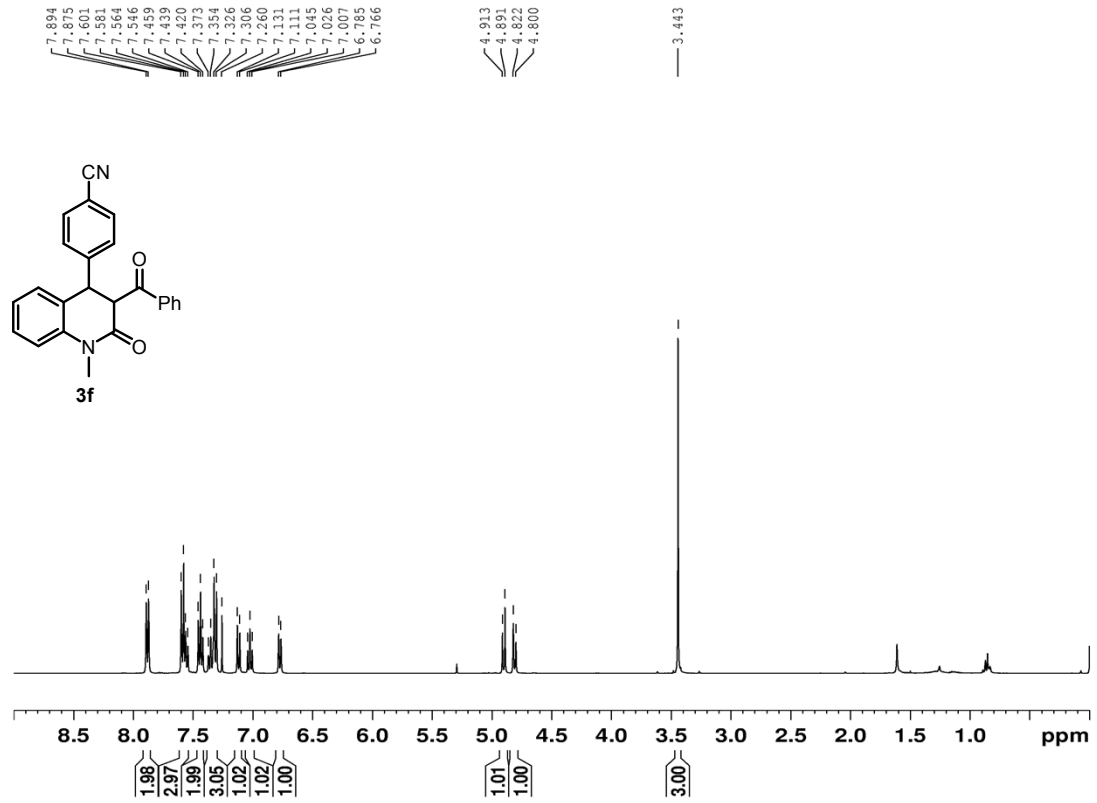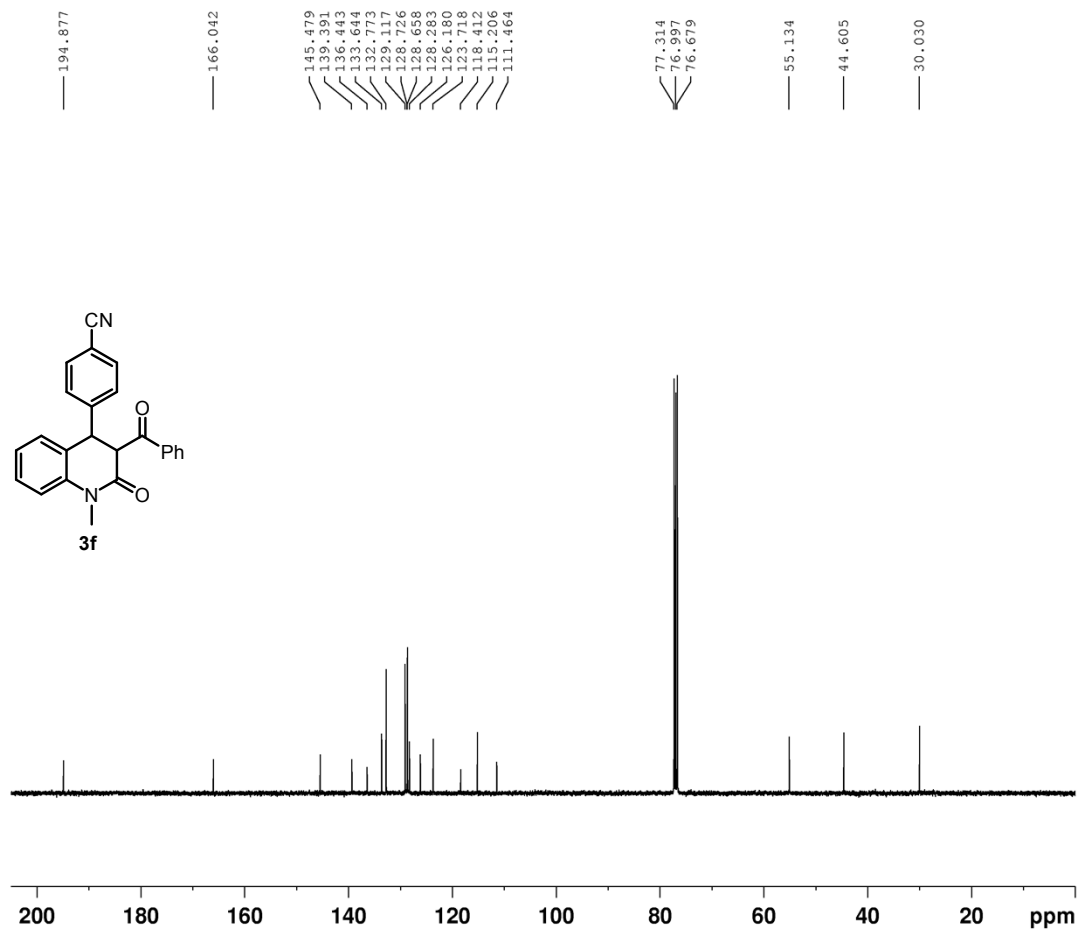

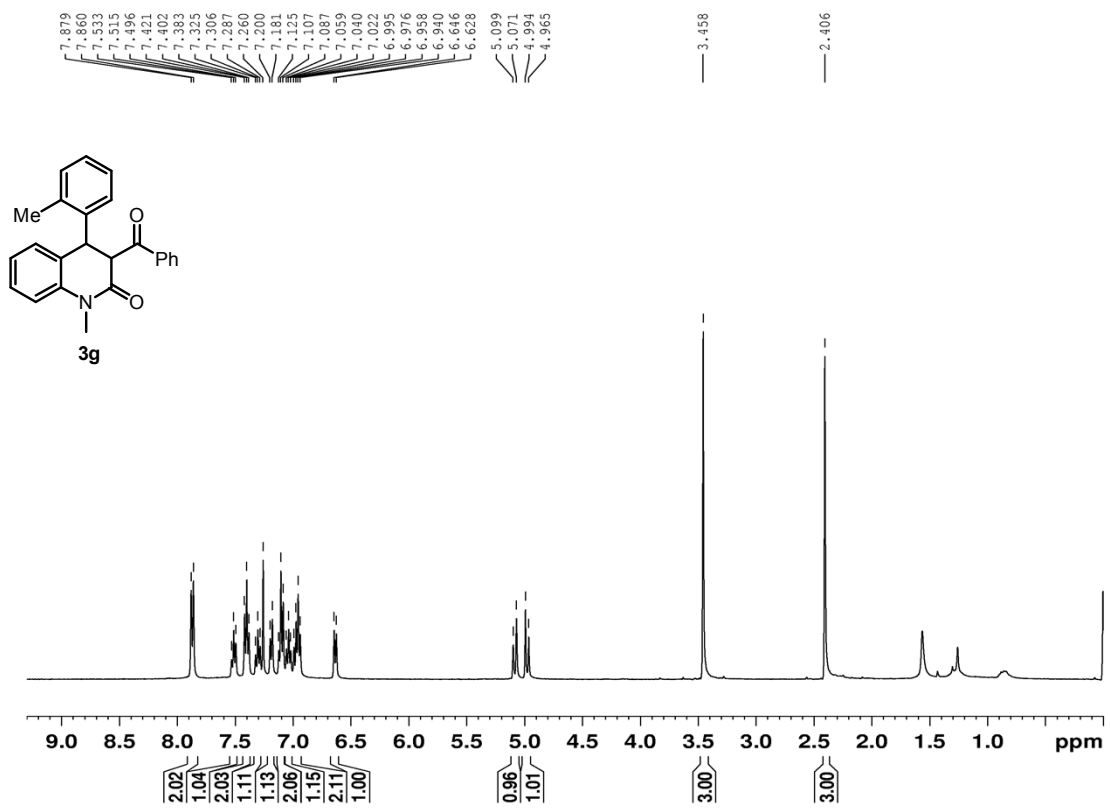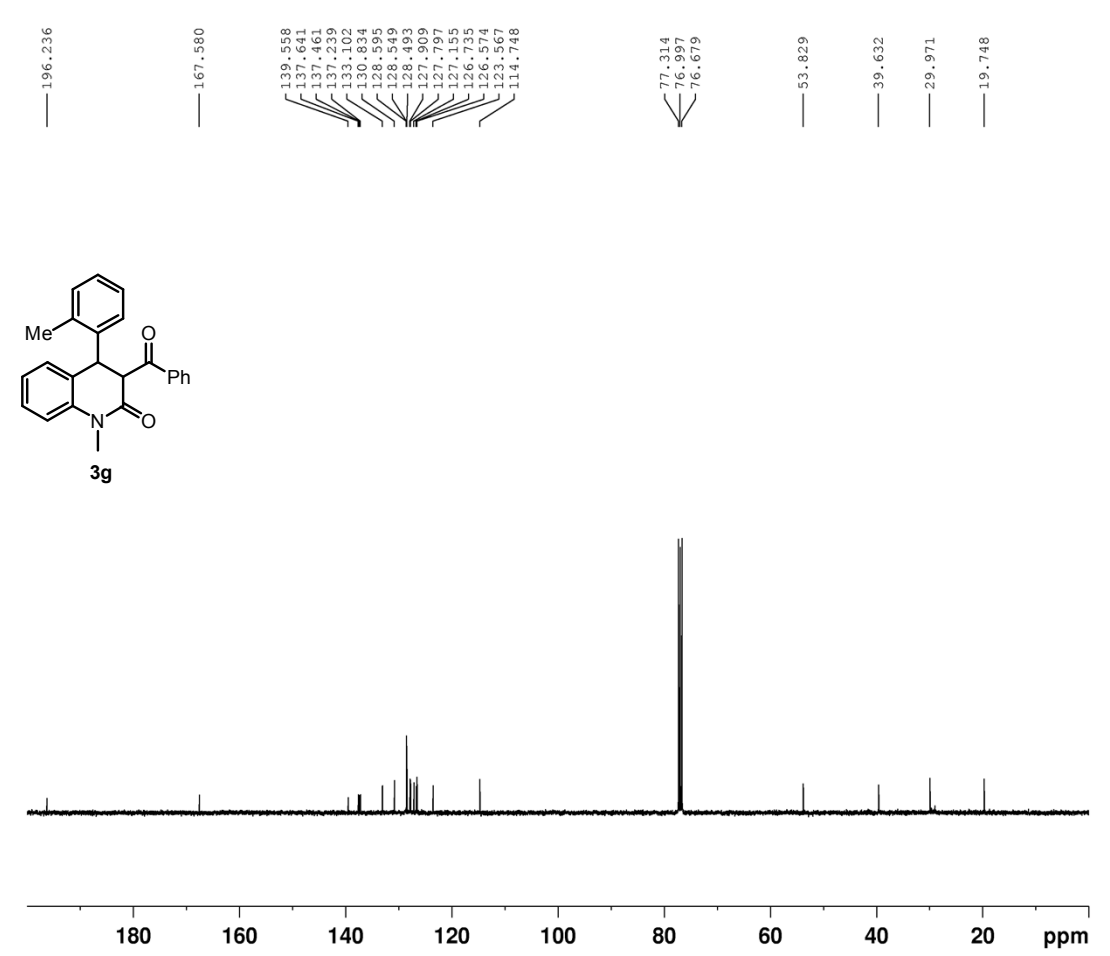

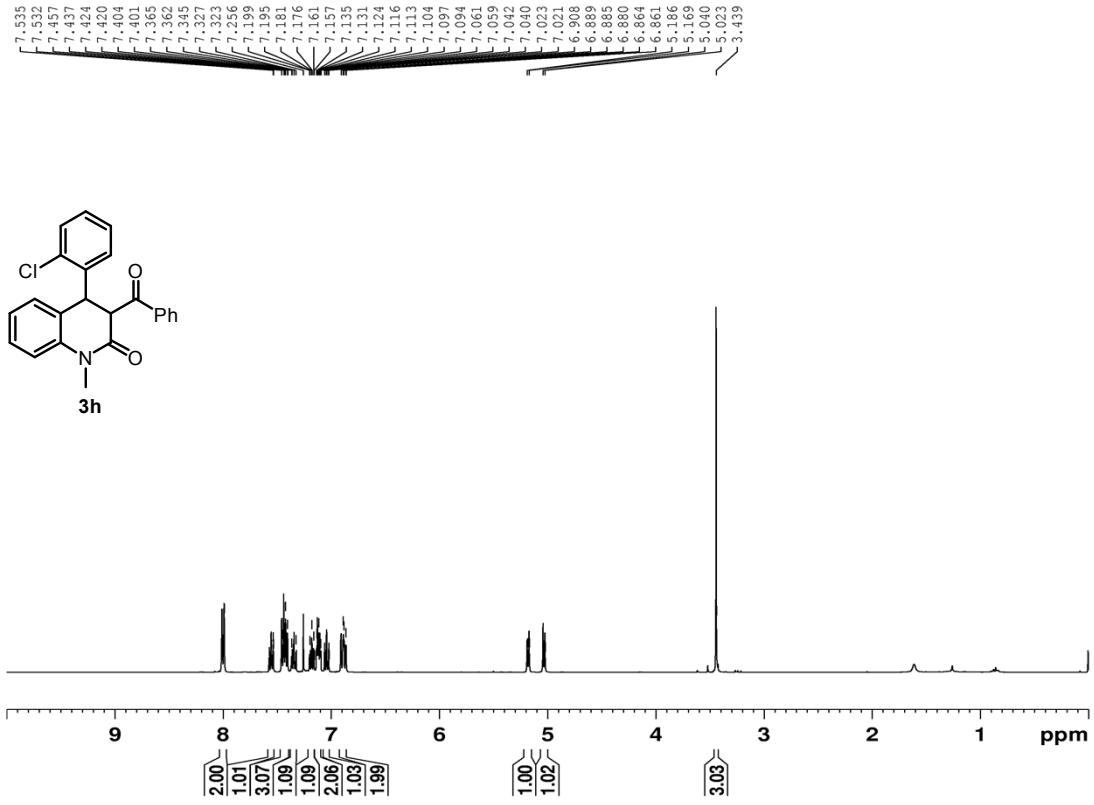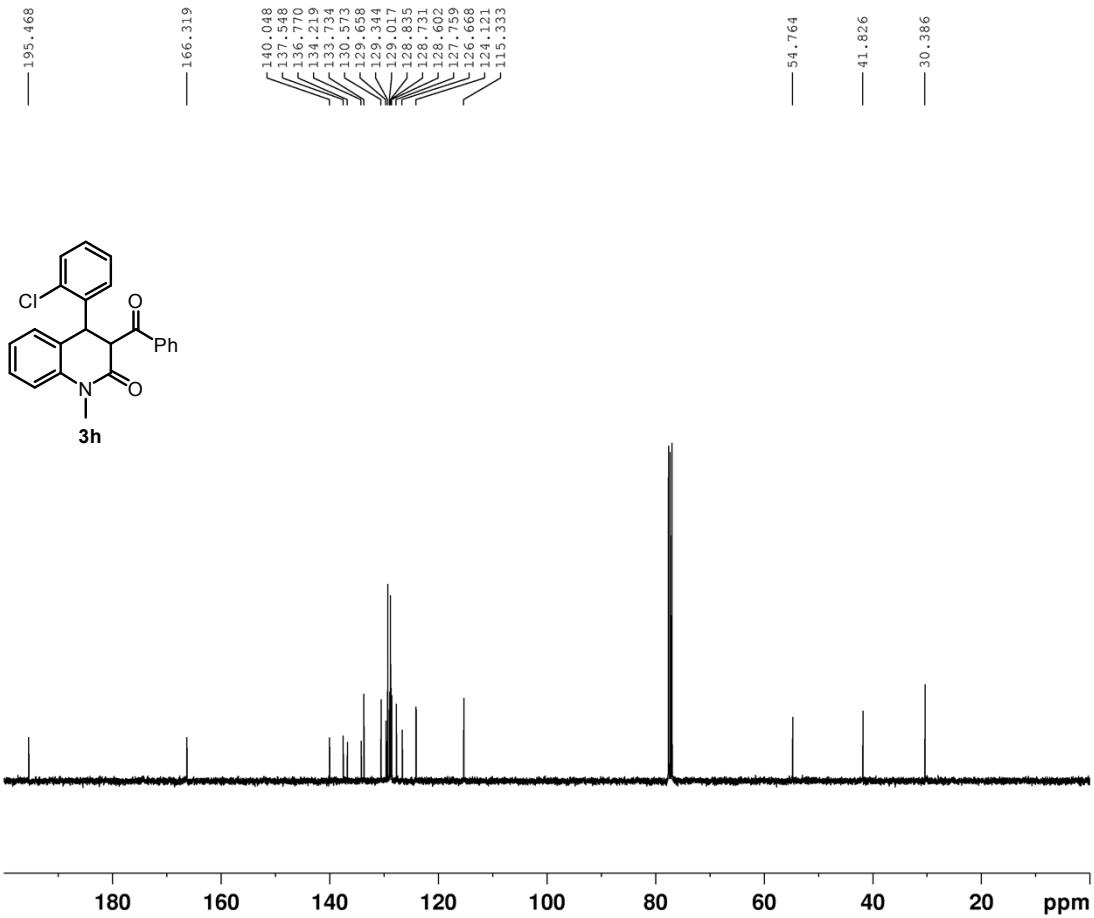

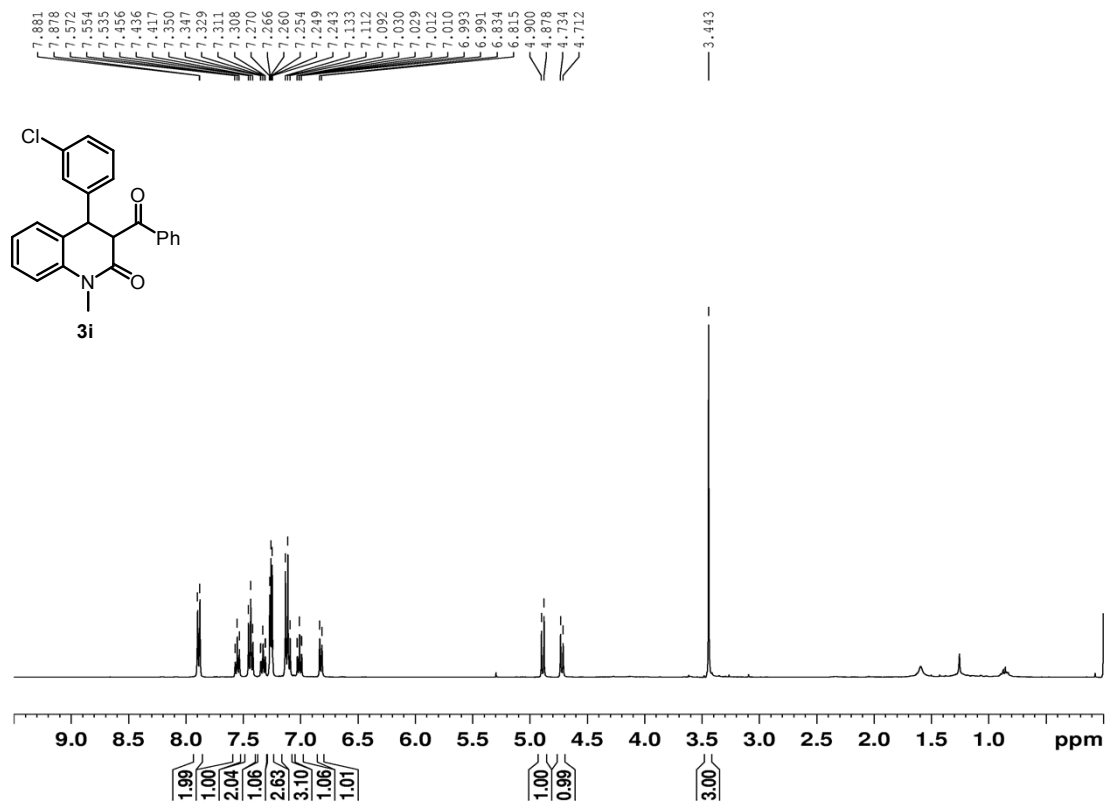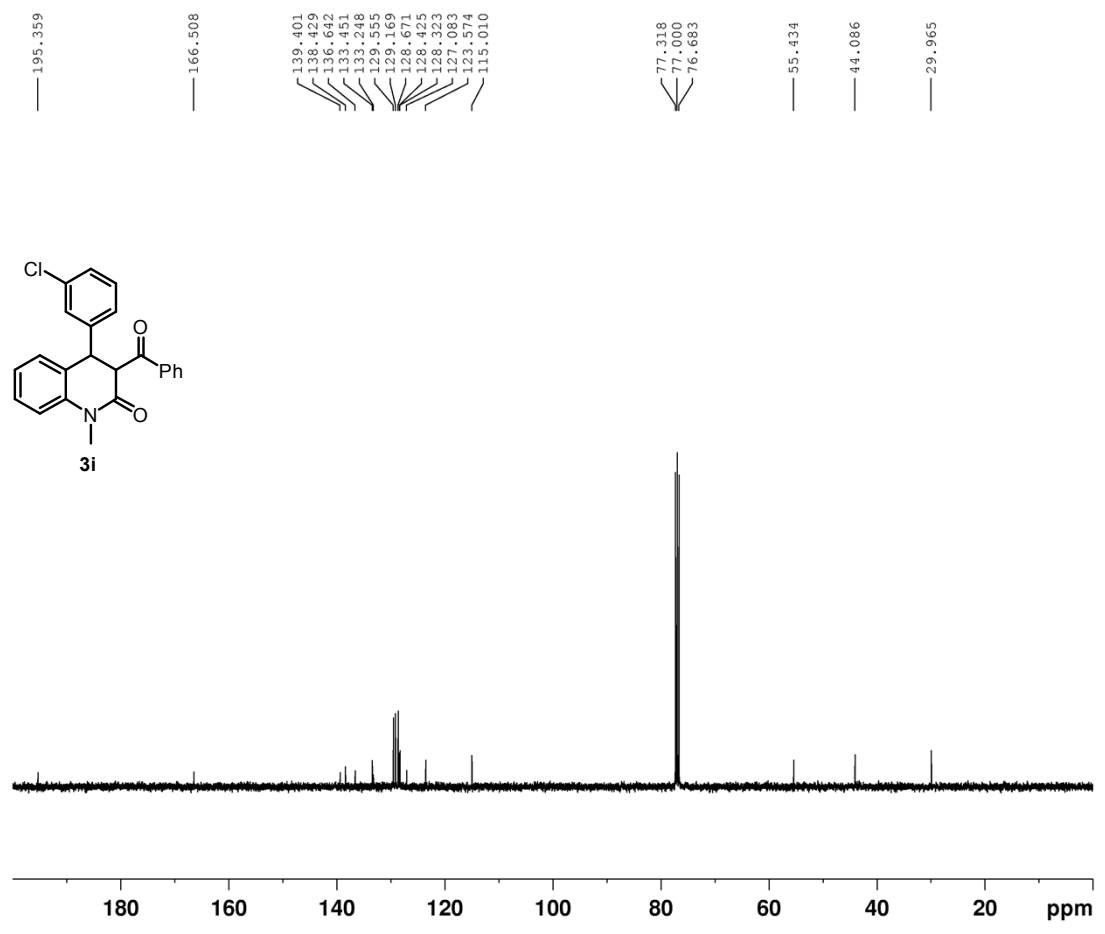



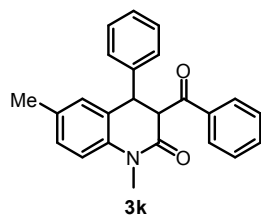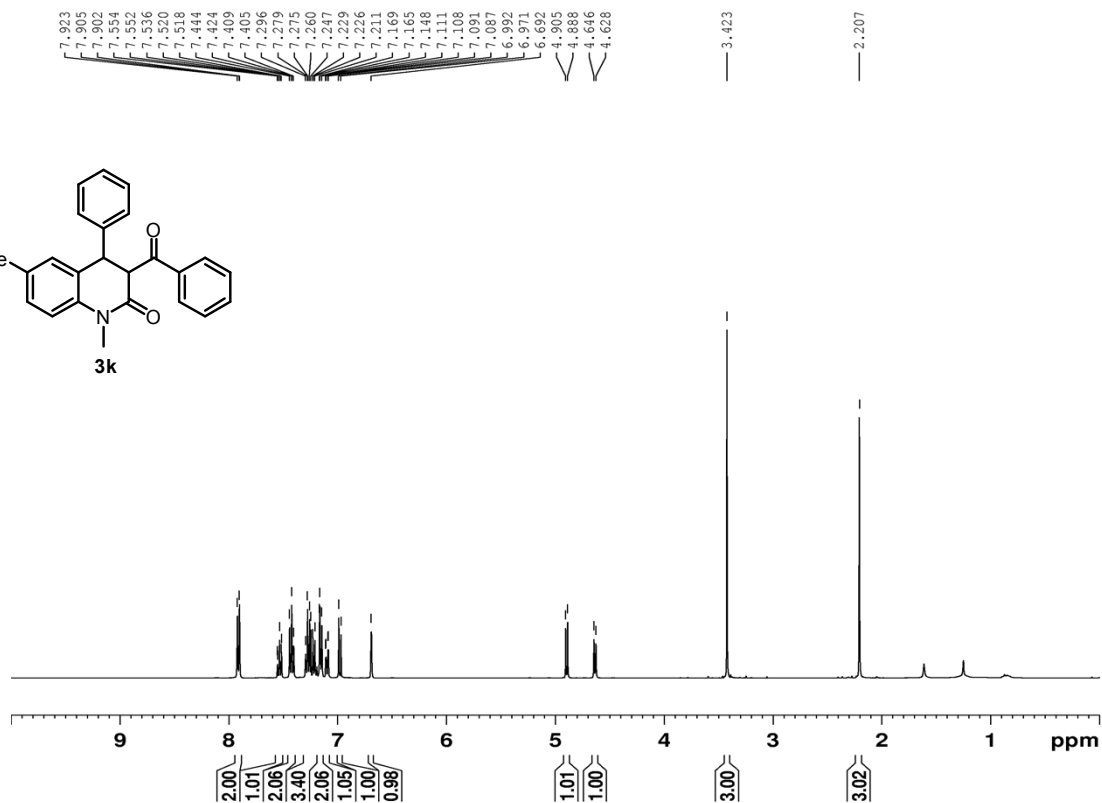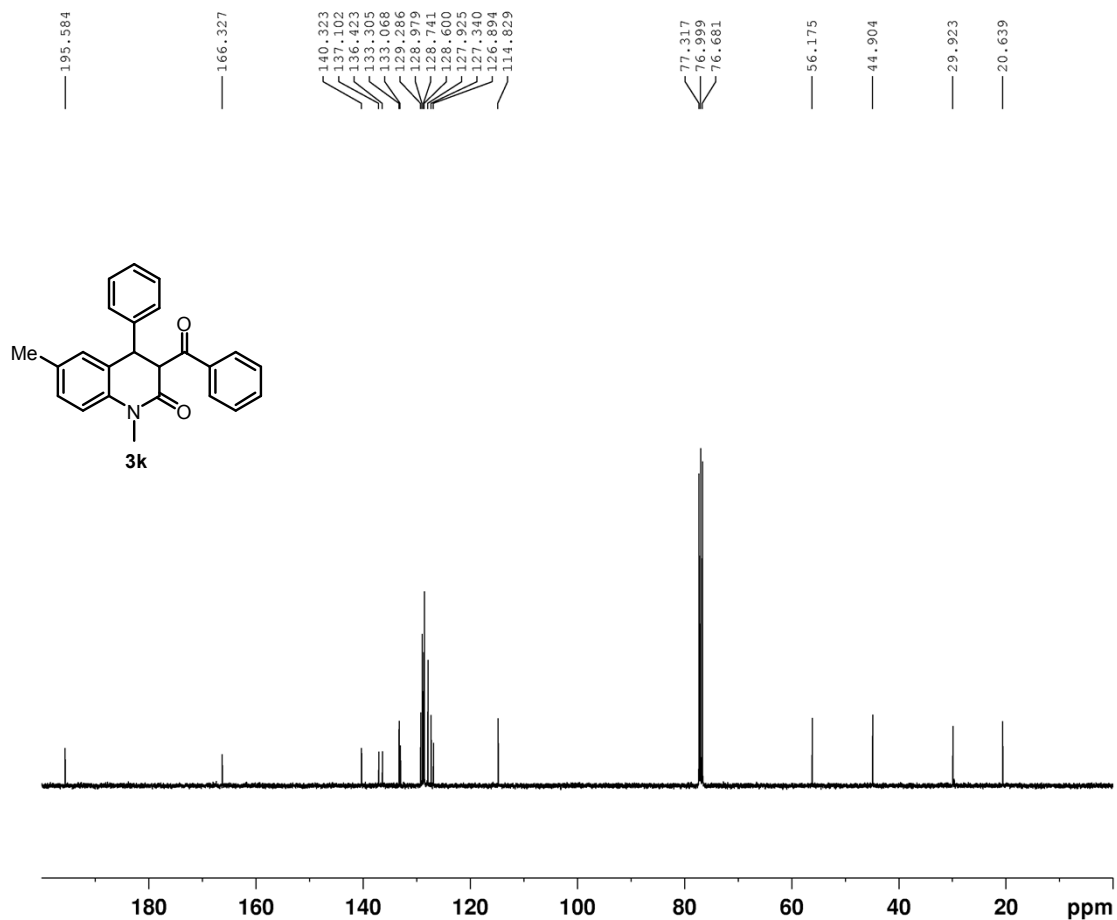

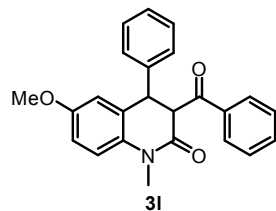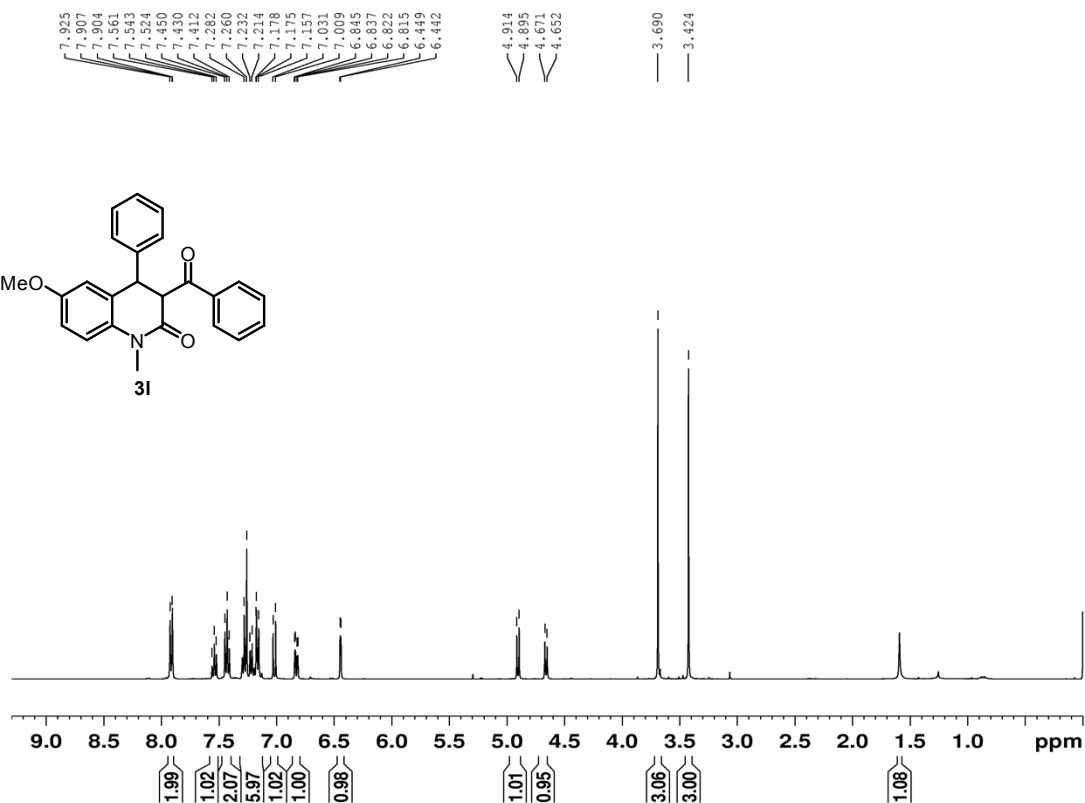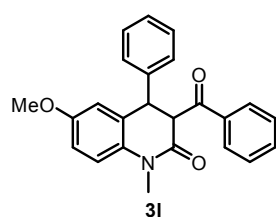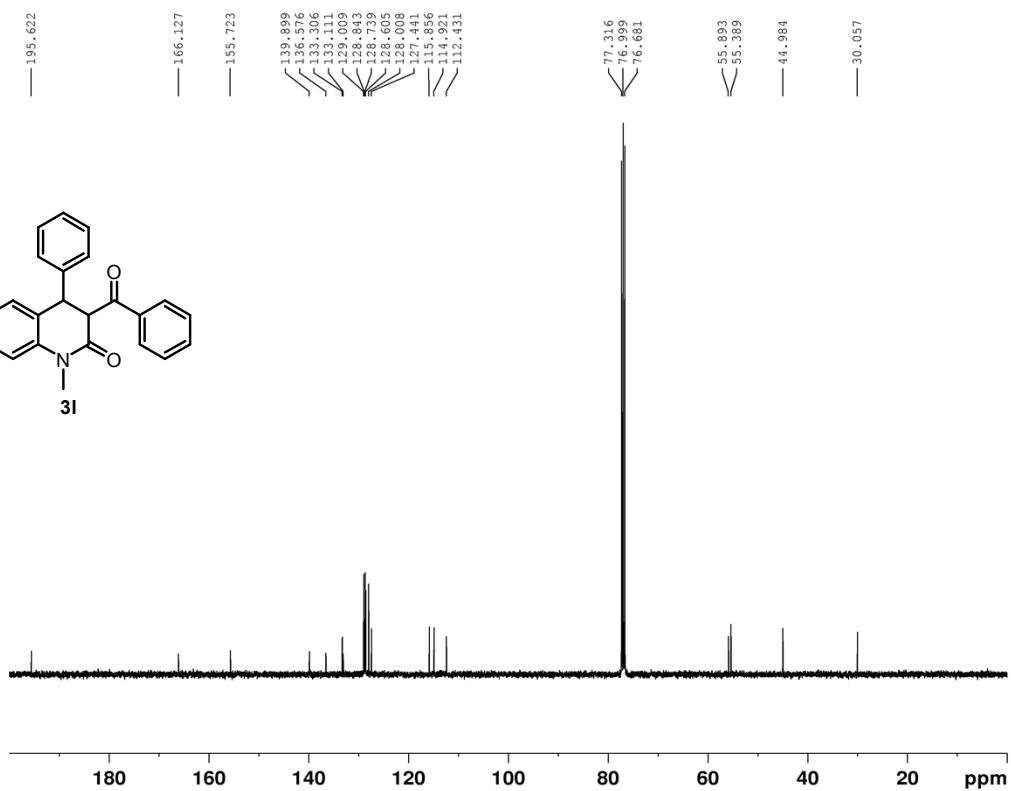

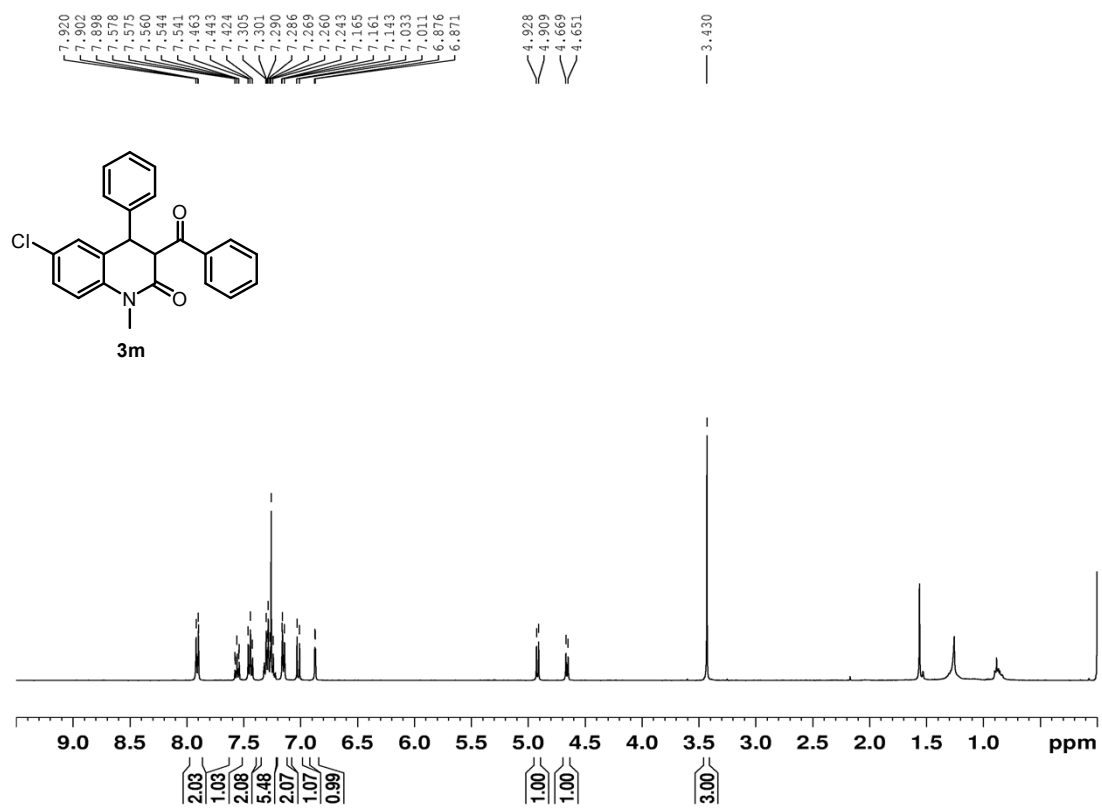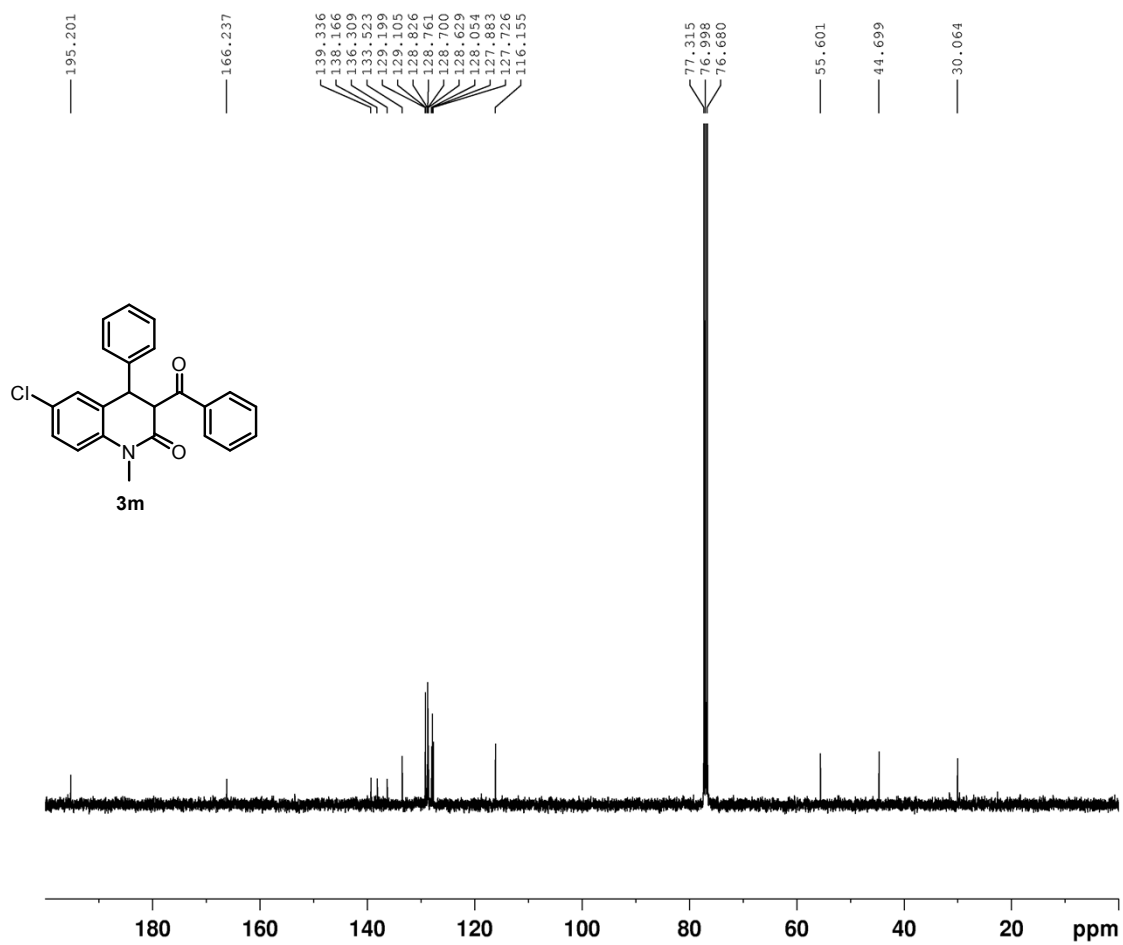

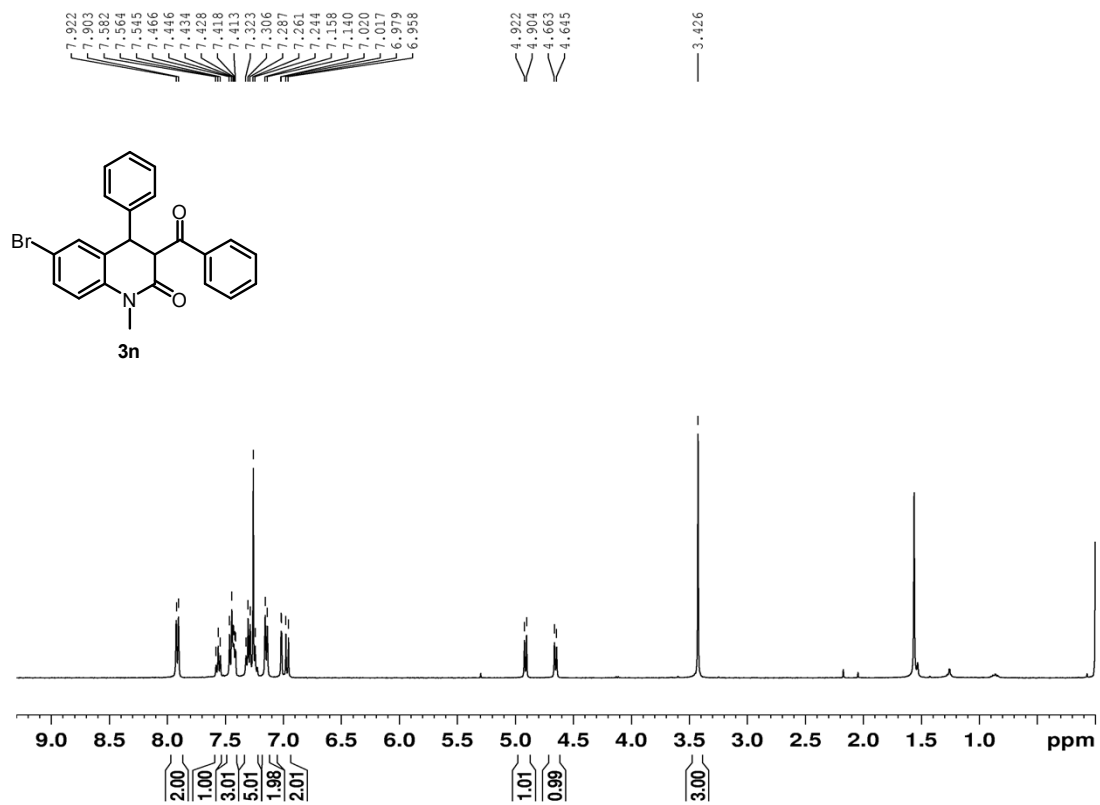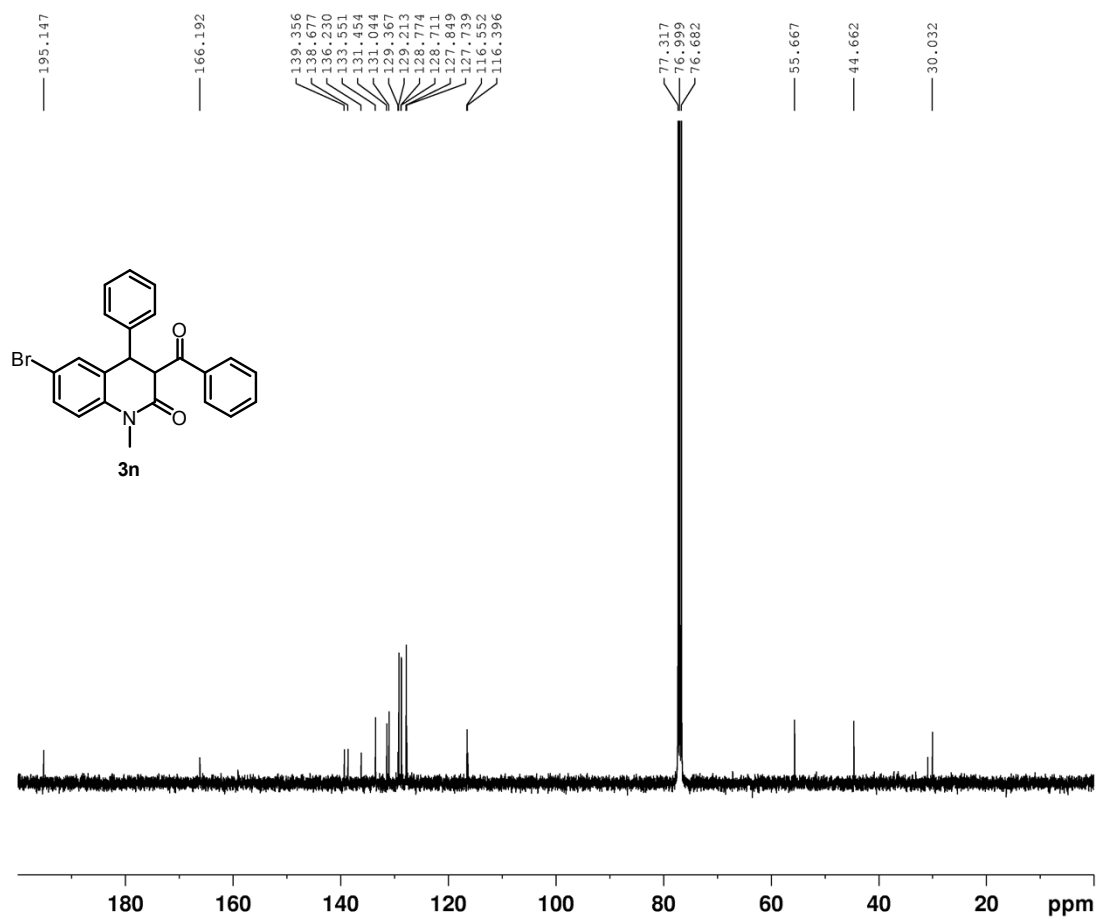

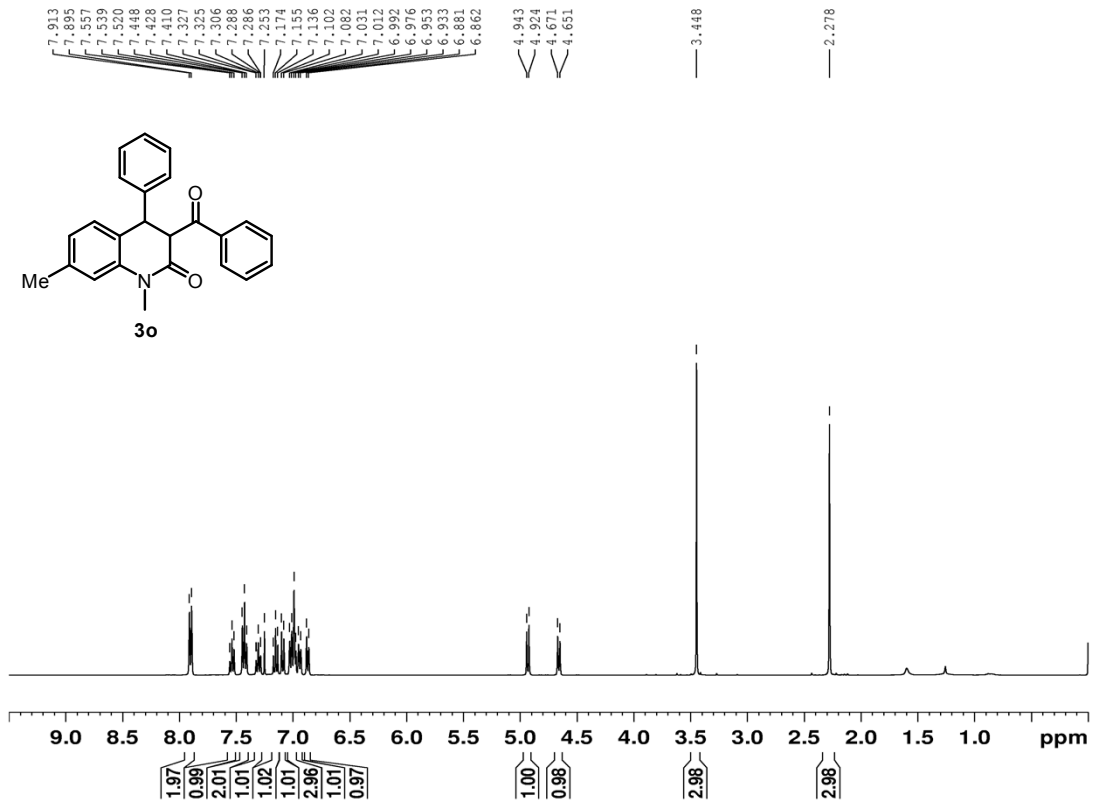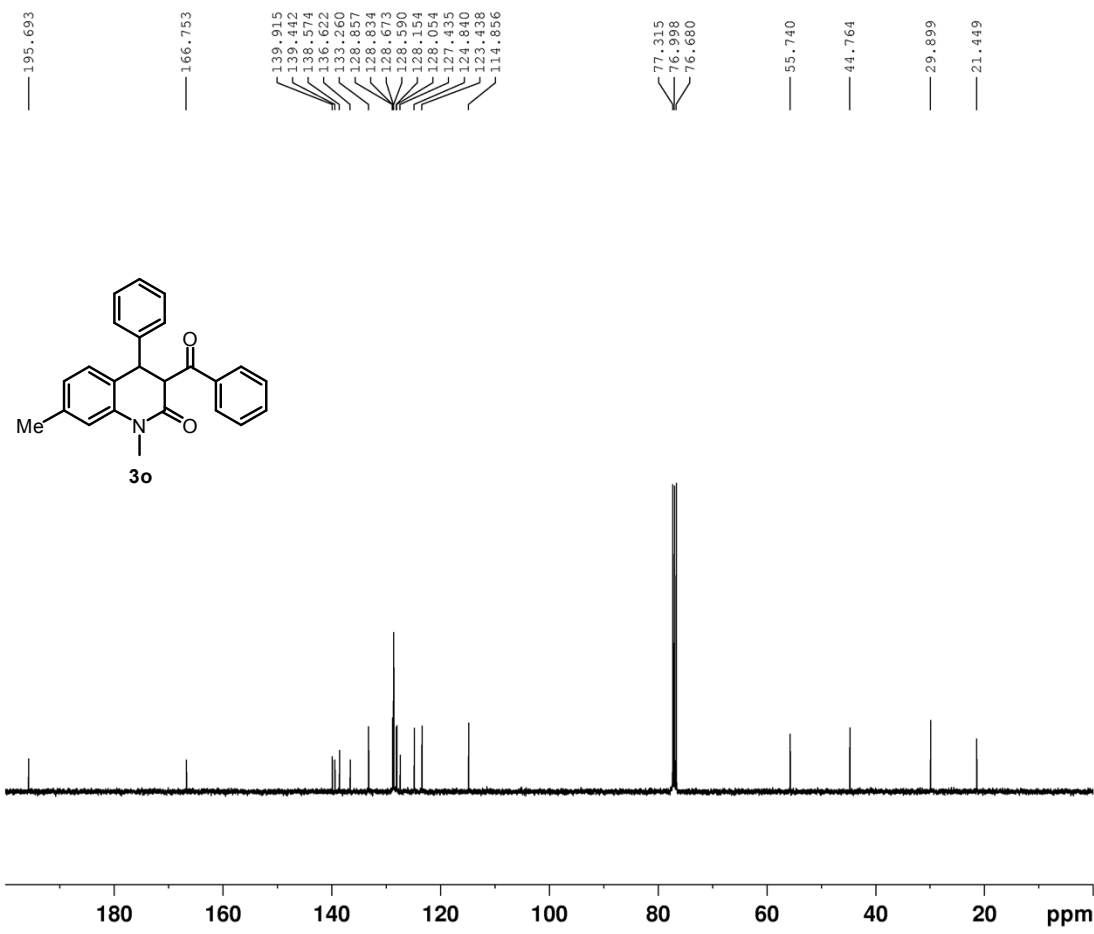

# <sup>1</sup>H NMR and <sup>13</sup>C NMR Spectra of the Products 4

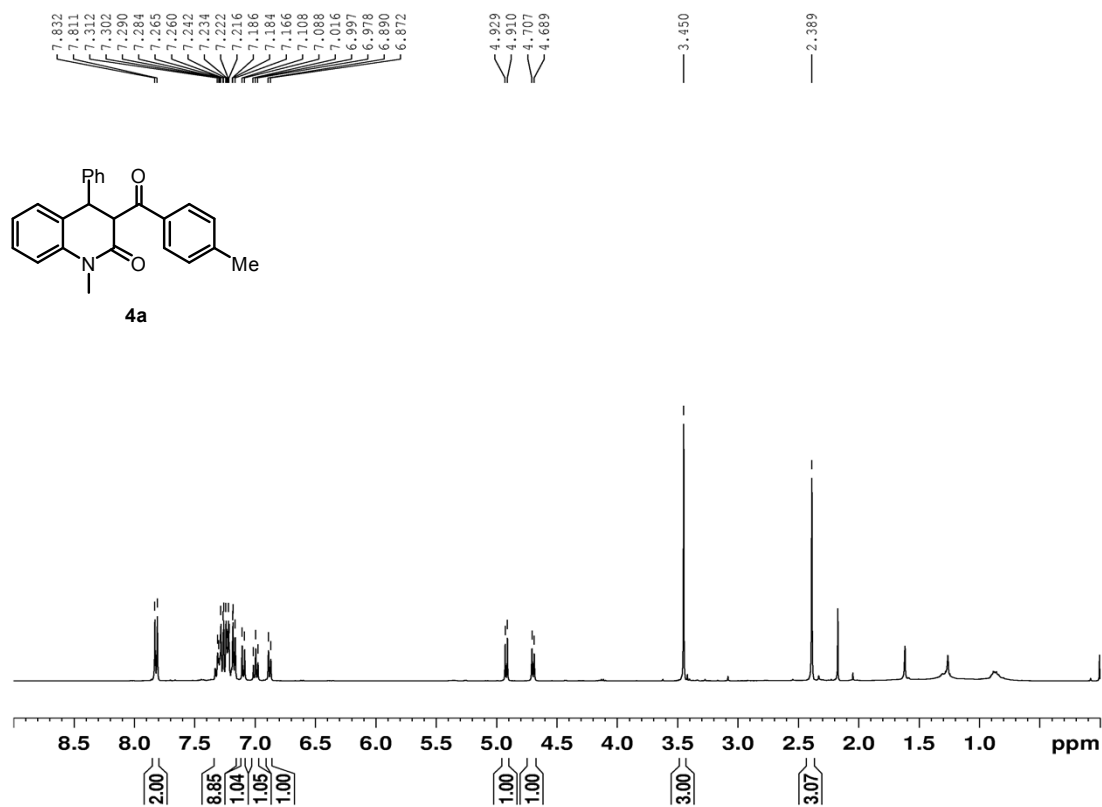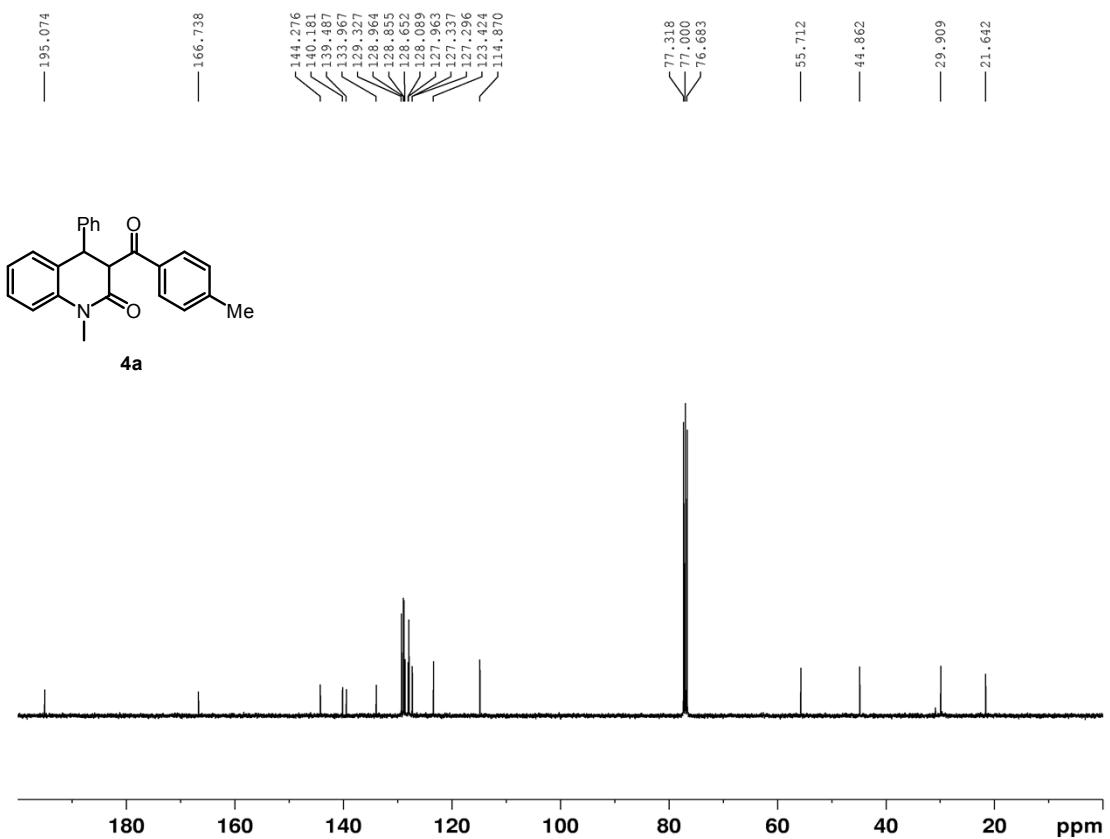

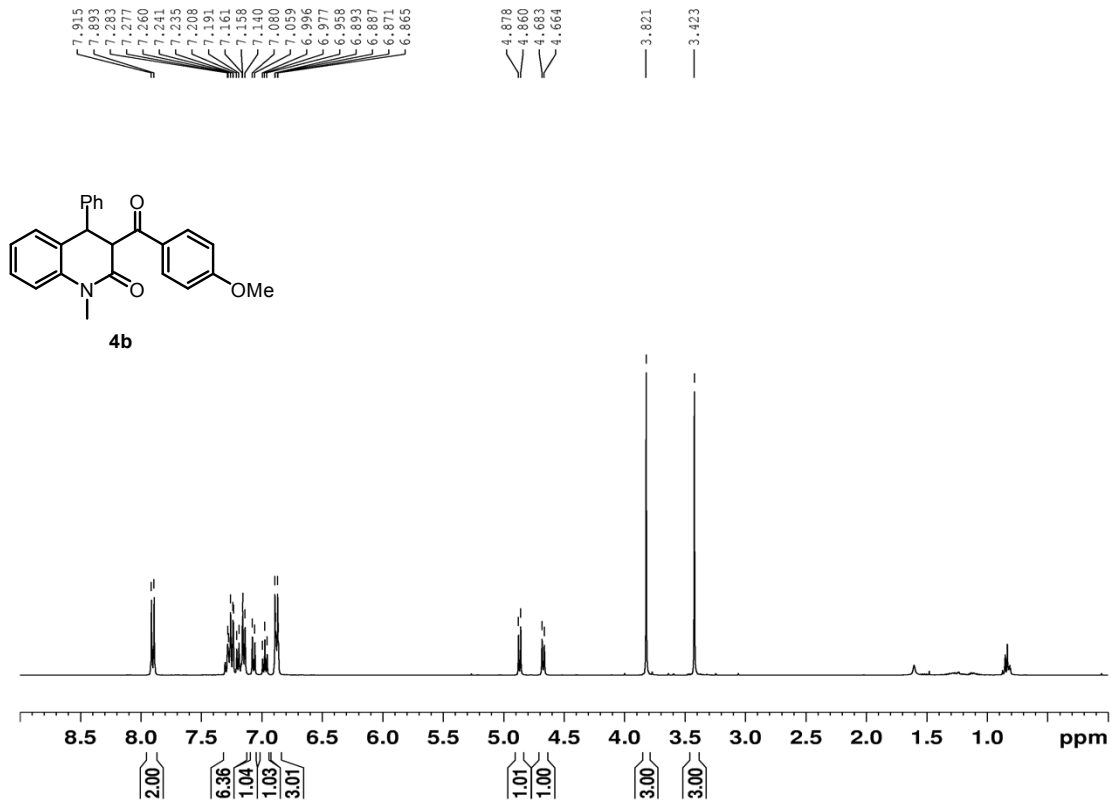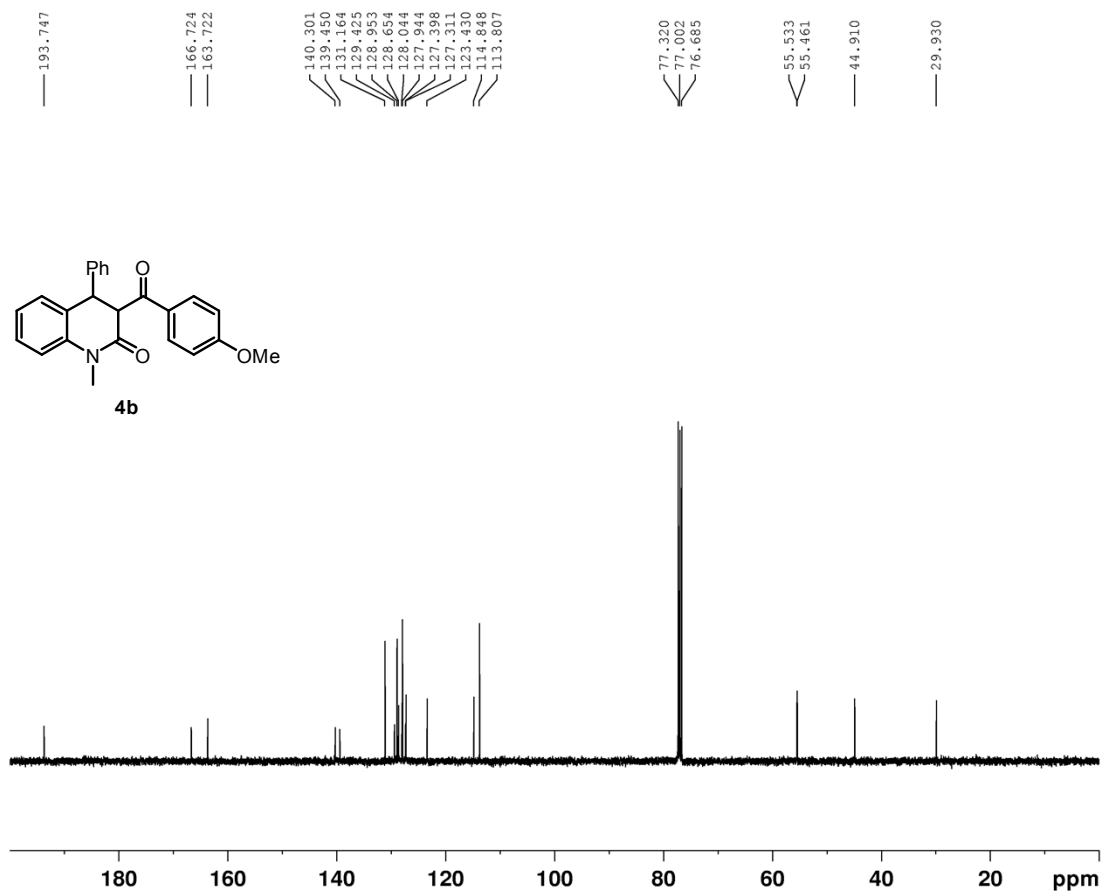





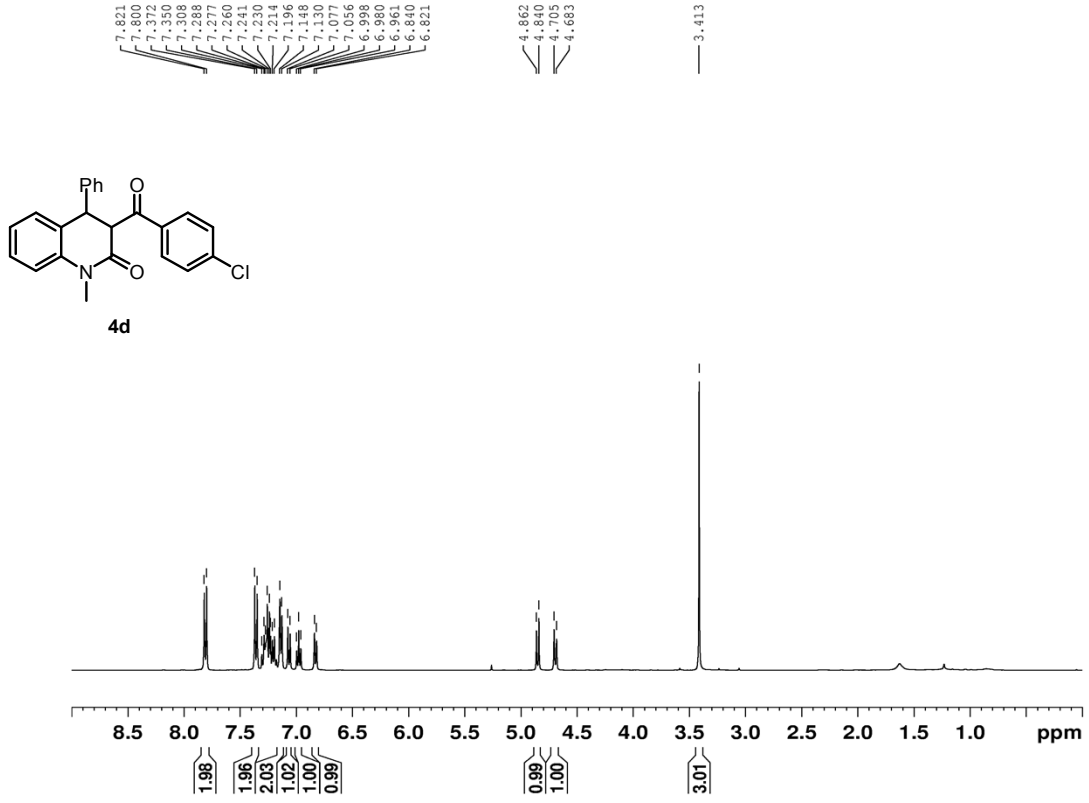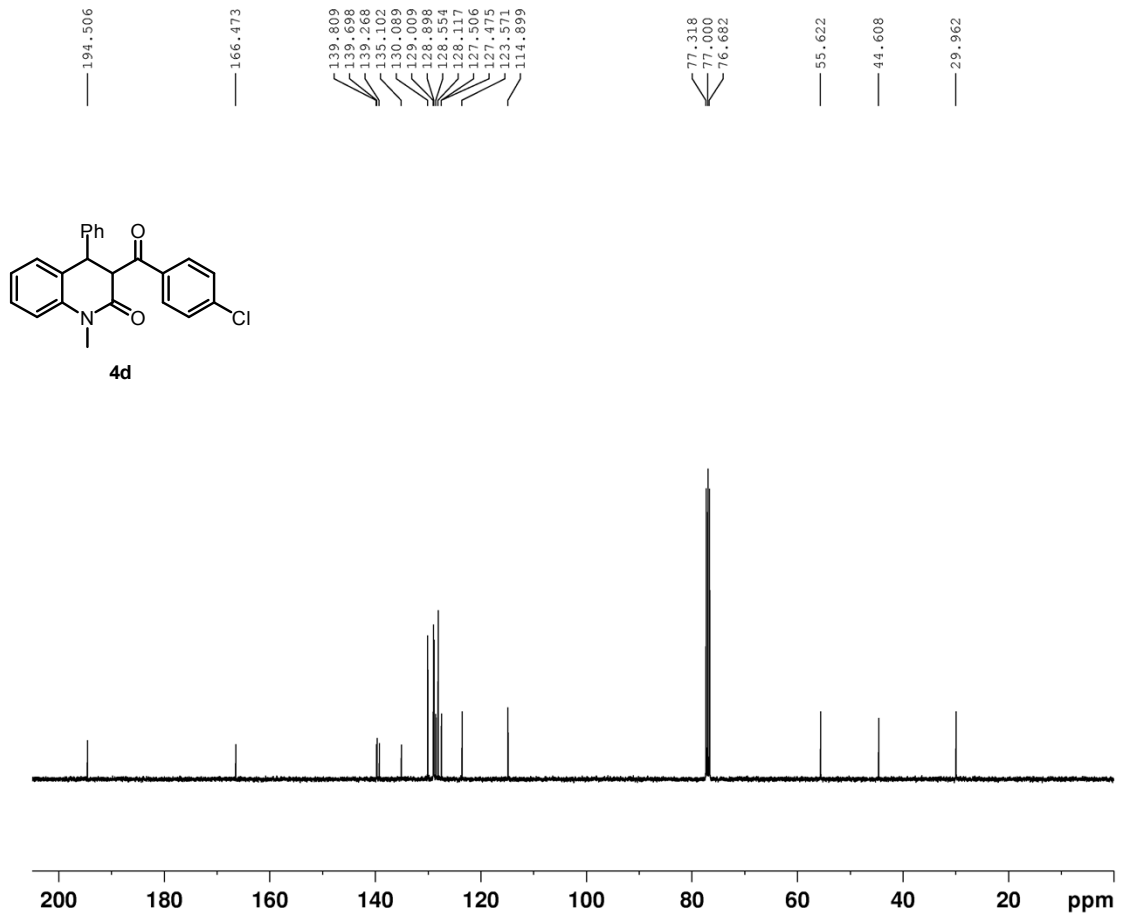

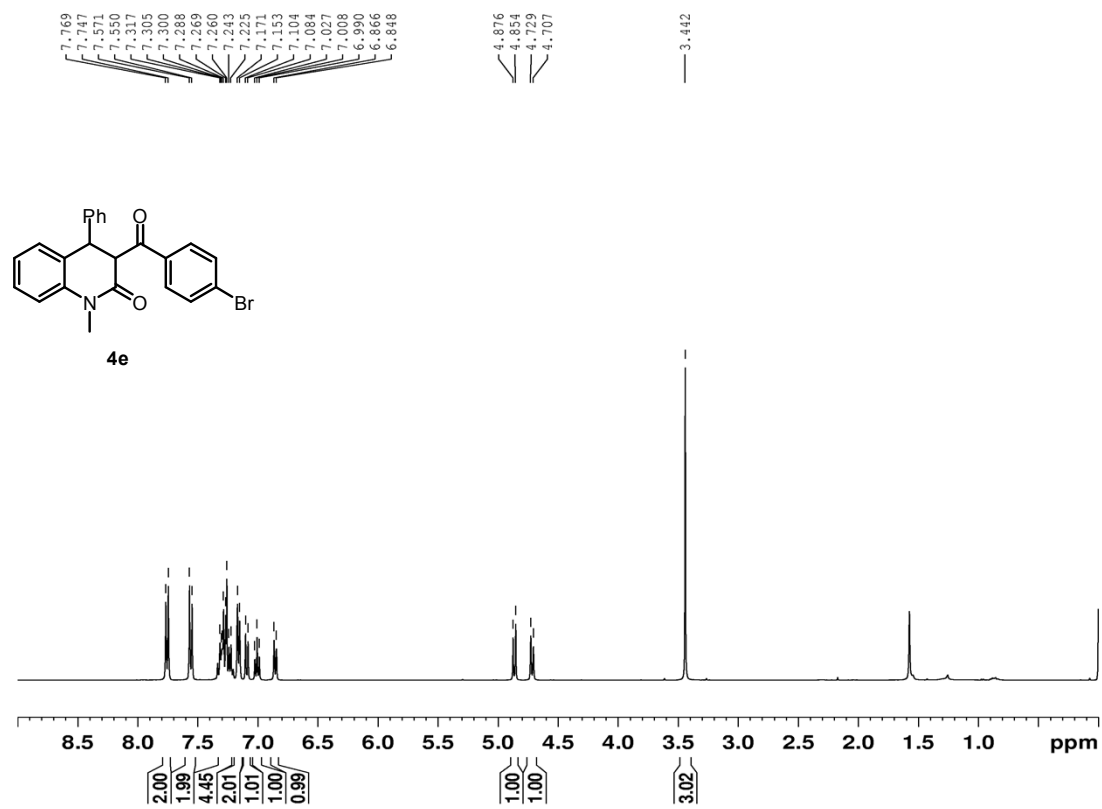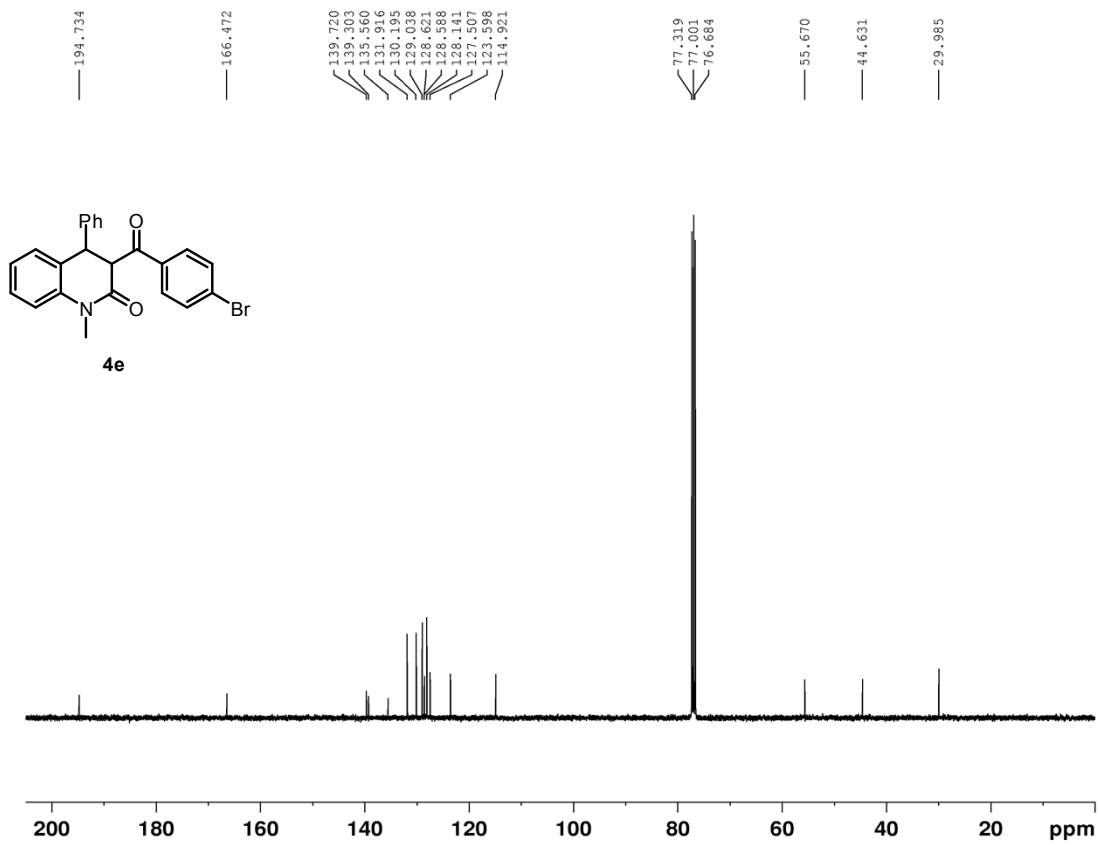

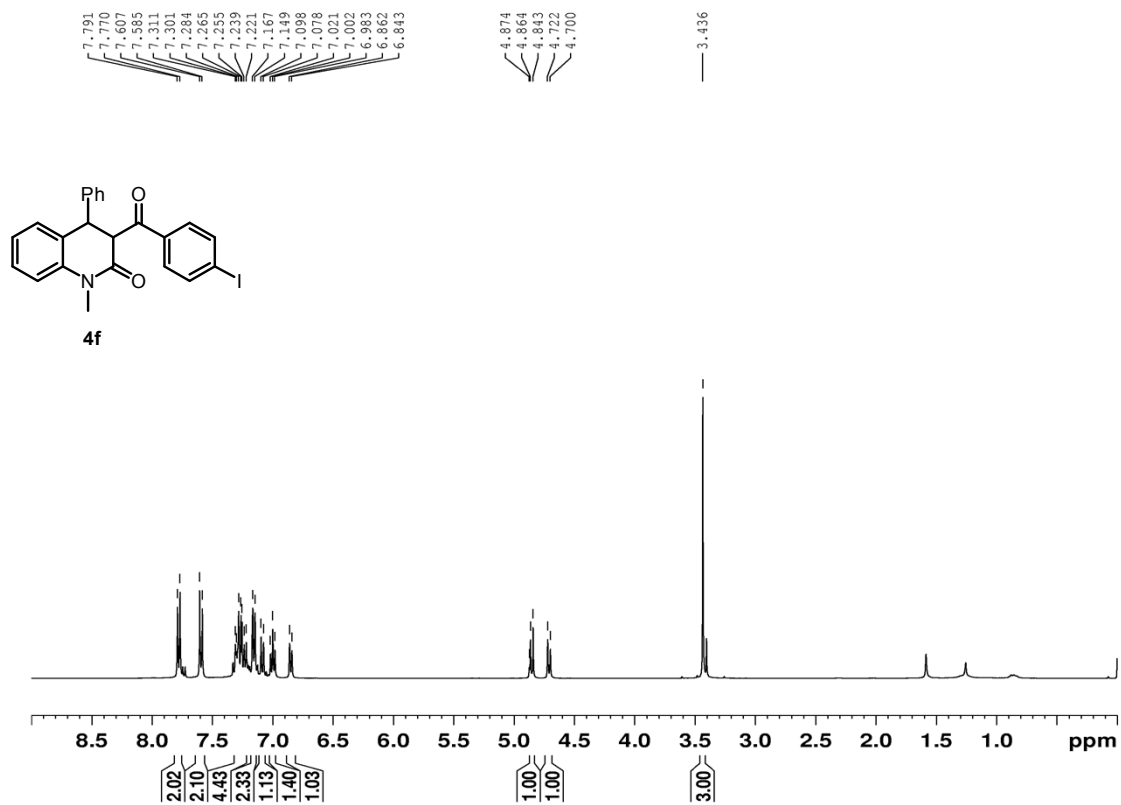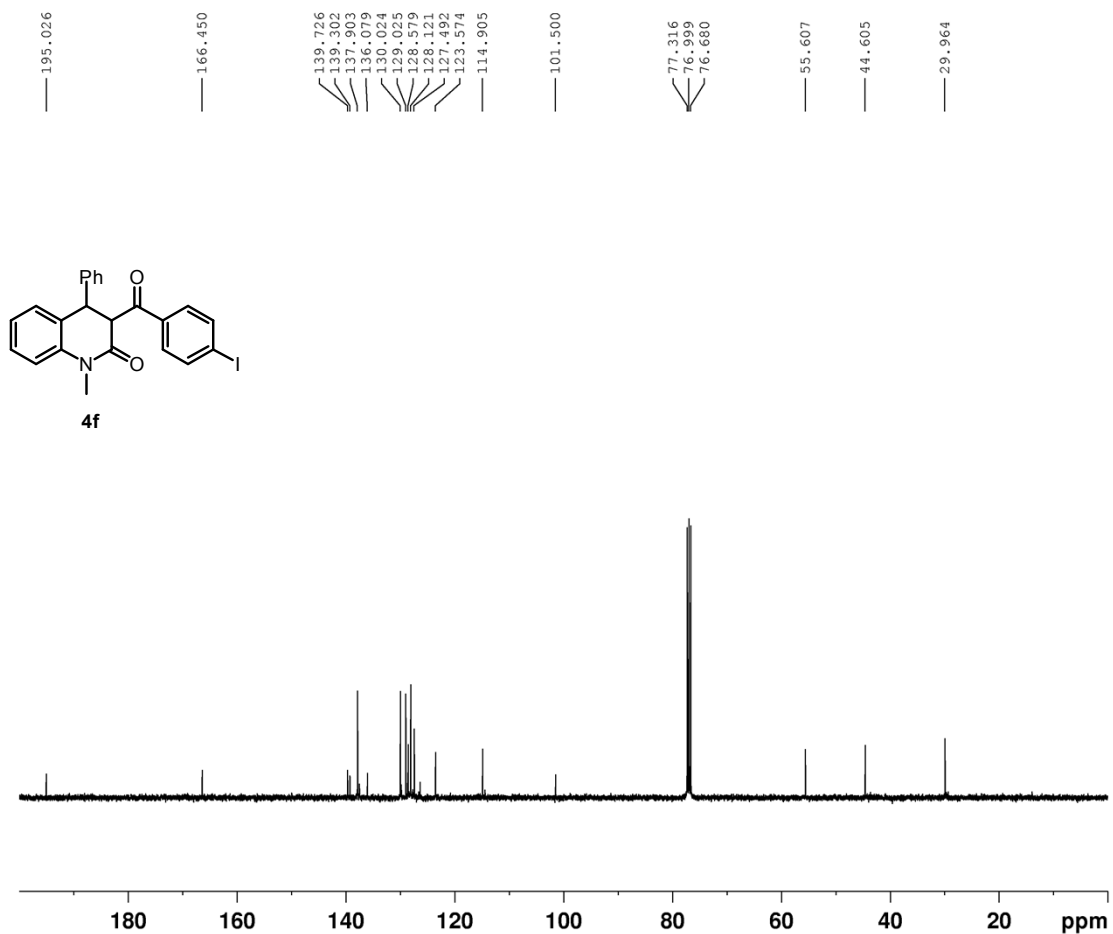

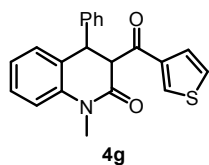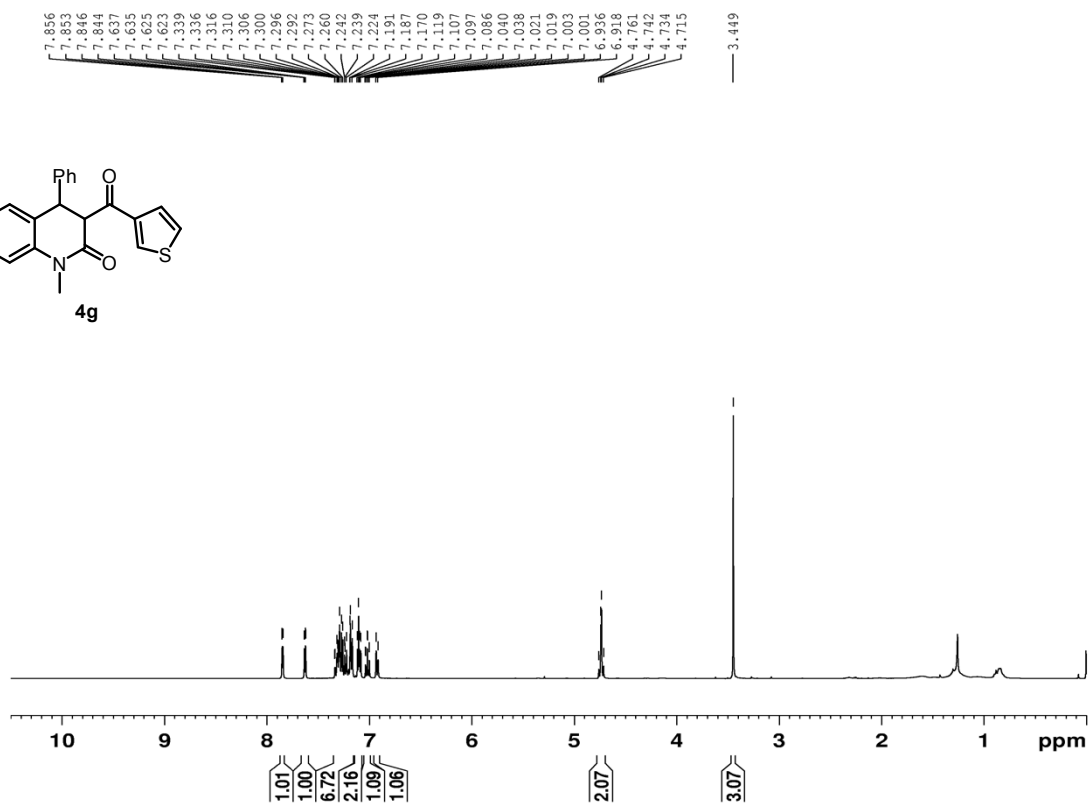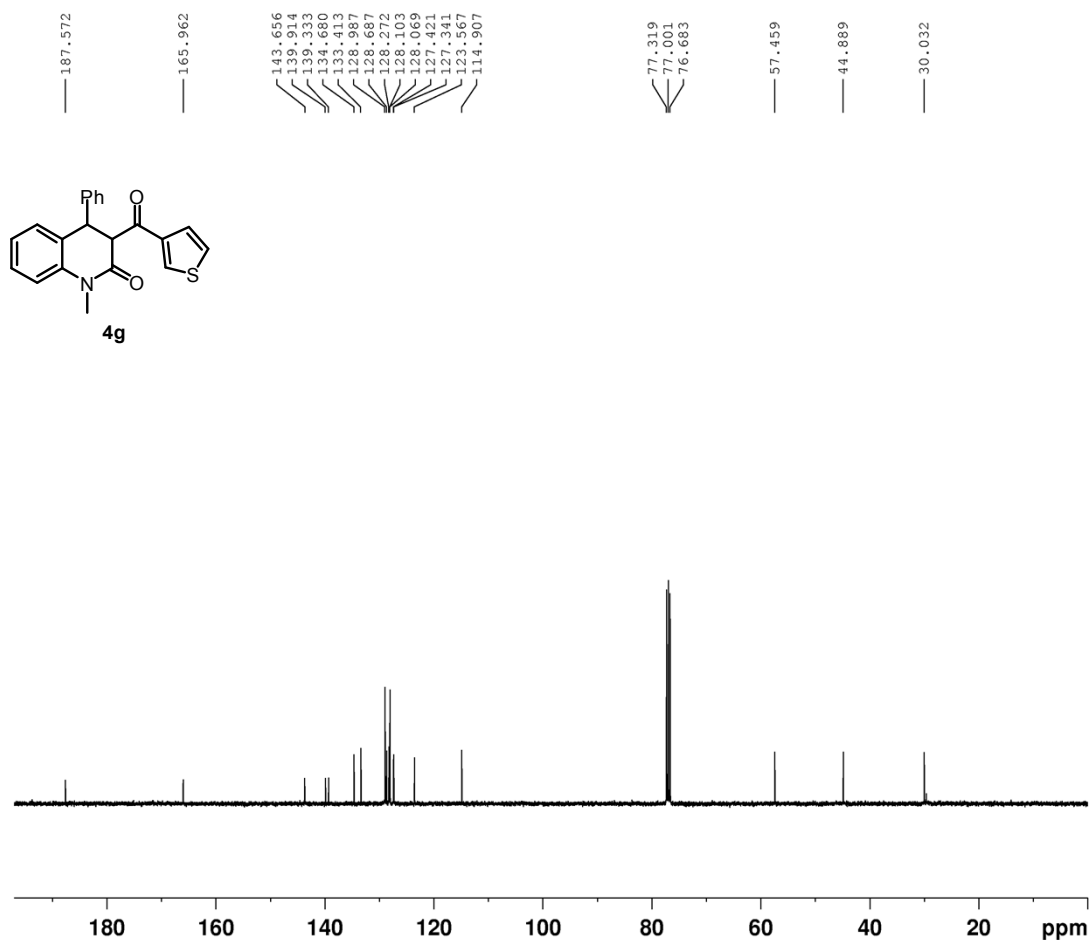

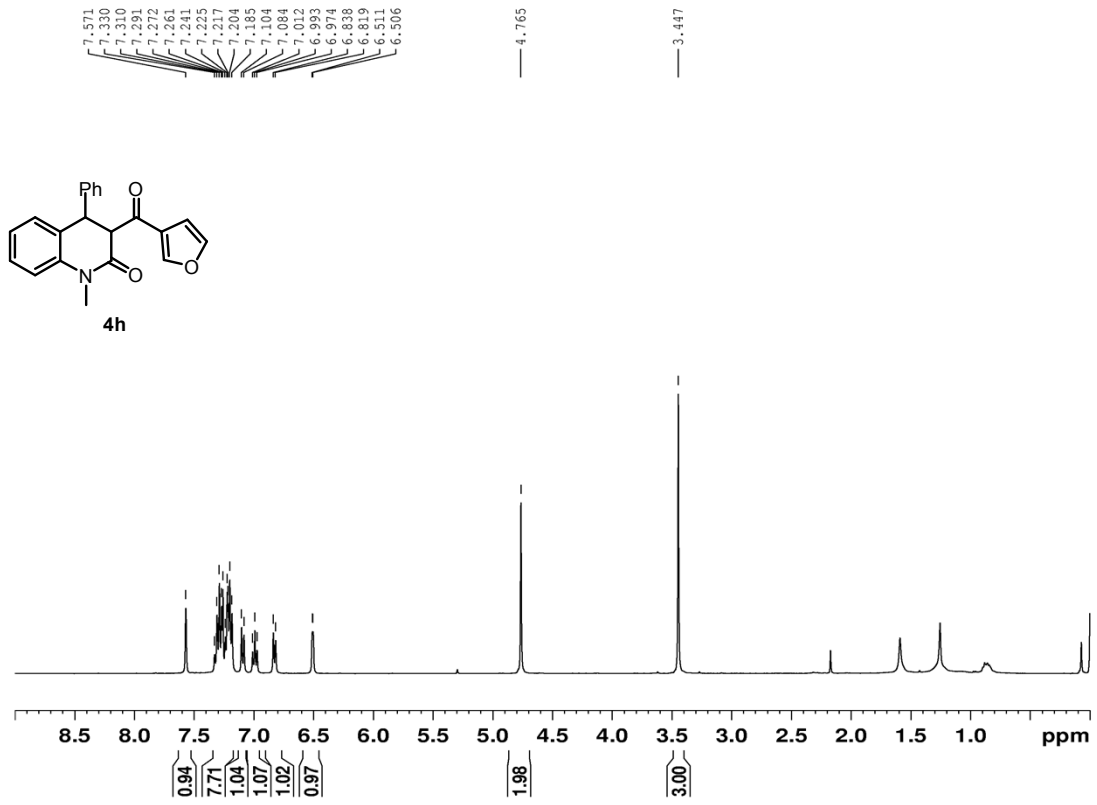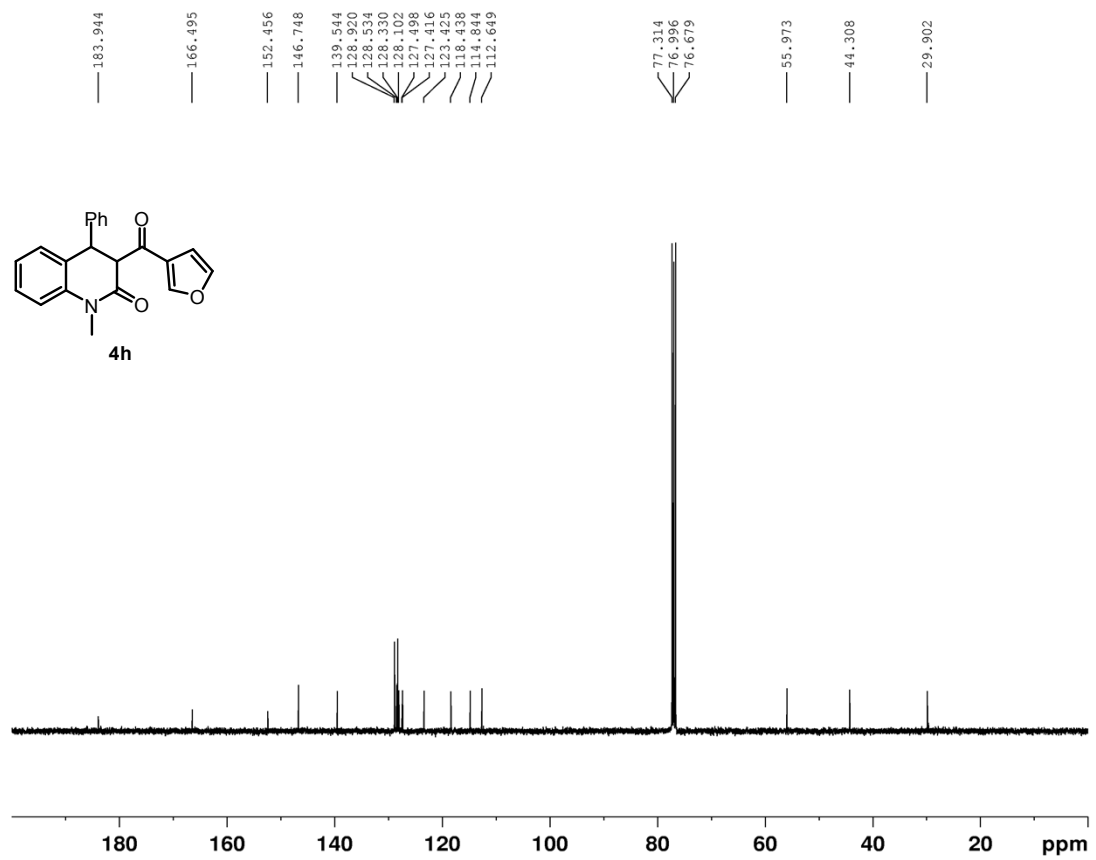

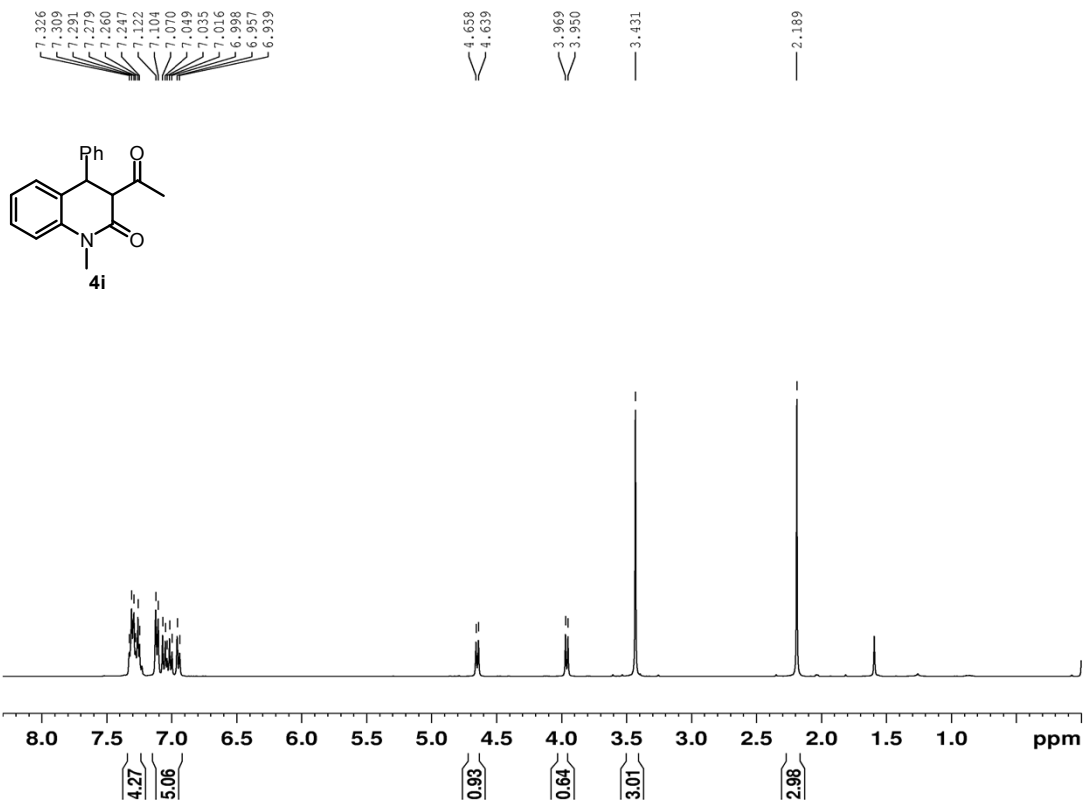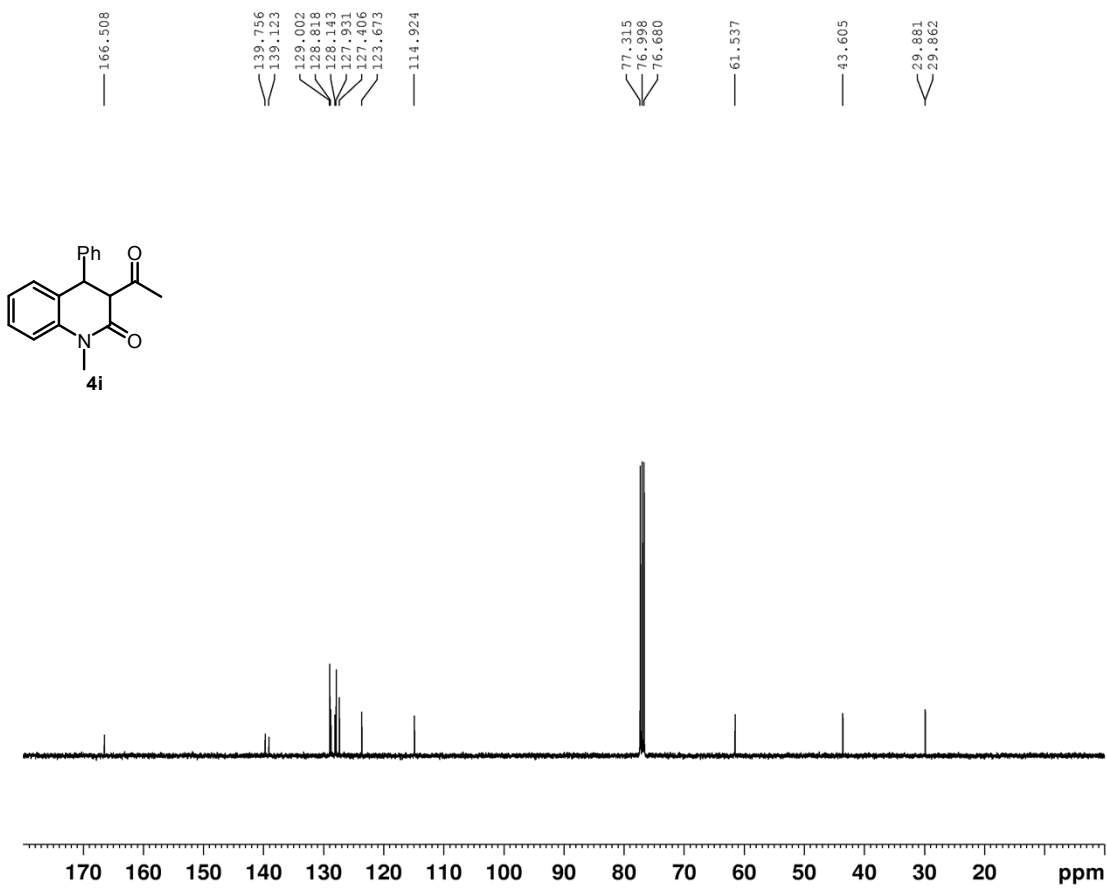

Supplement: c4ra08529a1.pdf [file c4ra08529a1.pdf]
